1 **The secreted neuronal signal Spock1 regulates the blood-brain barrier**

2

3

4

5

6 Natasha M. O’Brown<sup>1\*</sup>, Nikit B. Patel<sup>1</sup>, Ursula Hartmann<sup>2</sup>, Allon M. Klein<sup>1</sup>, Chenghua Gu<sup>3</sup>, Sean  
7 G. Megason<sup>1\*</sup>

8

9 <sup>1</sup> Department of Systems Biology, Harvard Medical School, 200 Longwood Ave, Boston, MA  
10 02115, U.S.A.

11 <sup>2</sup> University of Cologne, Joseph-Stelzmann-Str. 52 50931 Cologne, Germany

12 <sup>3</sup> Howard Hughes Medical Institute, Department of Neurobiology, Harvard Medical School, 220  
13 Longwood Ave, Boston, MA 02115, USA

14

15 \* denotes corresponding author

16

17 Correspondence:

18

19 Natasha M. O’Brown (Natasha\_obrown@hms.harvard.edu)  
20 Department of Systems Biology, Harvard Medical School  
21 Boston, MA 02115, U.S.A.

22

23 Sean G. Megason (megason@hms.harvard.edu)  
24 Department of Systems Biology, Harvard Medical School  
25 Boston, MA 02115, U.S.A.  
26 (Phone) 617-432-7441

27 **Abstract**

28  
29 **The blood-brain barrier (BBB) is comprised of a single layer of endothelial cells with**  
30 **uniquely restrictive properties required for maintaining a tightly controlled homeostatic**  
31 **environment in the brain. Classic quail-chick grafting experiments showed that BBB**  
32 **properties are not intrinsic to brain endothelial cells, but instead are induced by signals**  
33 **from the embryonic brain microenvironment. Here we have identified a neuronally**  
34 **produced signal, *Spock1*, that specifically regulates BBB functional development in both**  
35 **zebrafish and mice without affecting angiogenesis. Using a combination of mosaic genetic**  
36 **analysis, tracer leakage assays and live imaging we show that *Spock1* from neurons can**  
37 **regulate brain vasculature permeability non-cell autonomously. Electron microscopy**  
38 **analyses of *spock1* mutants revealed that the leakage arises predominantly through**  
39 **increased endothelial transcytosis of both clathrin-independent small and large vesicles**  
40 **due to altered pericyte-endothelial interactions. Single-cell RNA sequencing analyses**  
41 **revealed a reduction in vascular expression of the cell adhesion molecule *mcamb* in the**  
42 ***spock1* mutants, and this down-regulation of *mcamb* occurred specifically in regions with**  
43 **increased BBB leakage. These analyses indicate that the neuronal signal *Spock1* regulates**  
44 **BBB properties by altering vascular gene expression and cellular interactions.**

45  
46 The blood-brain barrier (BBB) maintains a tightly controlled homeostatic environment in the brain  
47 that is required for proper neural function. BBB breakdown has been implicated in multiple  
48 neurodegenerative diseases including Alzheimer's, Parkinson's and Huntington's Diseases<sup>1</sup>.  
49 Conversely, the BBB also serves as a barrier for drug delivery to the brain, prompting interest in  
50 understanding how to therapeutically regulate its permeability. The BBB is a specialized property  
51 of the brain vasculature, which is composed of a thin, continuous layer of non-fenestrated  
52 endothelial cells with uniquely restrictive properties. Brain endothelial cells create the barrier via  
53 two primary cellular mechanisms: 1) specialized tight junction complexes that block the transit of  
54 small water-soluble molecules between cells and 2) reduced levels of vesicular trafficking or  
55 transcytosis to restrict transit through endothelial cells<sup>2</sup>. Classic quail-chick chimera experiments  
56 showed that these restrictive properties are not intrinsic to BBB endothelial cells, but rather are  
57 acquired during development through their interactions with signals in the brain  
58 microenvironment<sup>3</sup>. Furthermore, these microenvironmental signals are also required to actively  
59 maintain these restrictive properties<sup>4-8</sup>. Wnt signaling arising from both neuronal and astrocytic  
60 sources is the only microenvironmental signal shown to induce and maintain BBB function<sup>8-14</sup>.  
61 However, it is likely only one of many signals that regulate BBB properties and plays roles in both  
62 angiogenesis and barrierogenesis<sup>11,12</sup>.

63  
64 We previously characterized the molecular and subcellular mechanisms of functional BBB  
65 development in the optically accessible vertebrate zebrafish<sup>15</sup>. During these studies, we  
66 serendipitously discovered a recessive mutant with forebrain and midbrain barrier leakage of both  
67 an injected 1 kDa Alexa Fluor (AF) 405 NHS Ester and a transgenic 80 kDa serum protein DBP-  
68 EGFP<sup>16</sup> at 5 days post fertilization (dpf), when the wild type BBB is functionally sealed (Fig. 1a-  
69 c)<sup>15</sup>. Mutants exhibit increased vascular permeability as early as 3 dpf with no improvement in  
70 BBB function throughout larval development (Extended Data Fig. 1). This increased BBB  
71 permeability in homozygous mutants occurs the absence of hemorrhage or vascular patterning  
72 defects (Extended Data Fig. 2), alterations in neural activity (Extended Data Fig. 3), or any  
73 reduction in viability or fertility. Time lapse imaging of injected 10 kDa Dextran revealed a steady  
74 accumulation of Dextran in the brain parenchyma of leaky mutants over the course of an hour  
75 (Extended Data Fig. 4), closely resembling the dynamics of Dextran leakage observed in *mfsd2aa*  
76 mutants with increased endothelial transcytosis<sup>15</sup>.

77



78 To identify the mutation responsible for this leakage phenotype, we performed linkage mapping  
79 on 5 dpf mutant and wild type siblings using bulk segregant RNAseq<sup>17</sup> and identified a single peak  
80 at chr14:2205271-3513919 (GRCz11; Fig. 1d, Extended Data Fig. 5). Of the 14 genes within the  
81 linkage region (Extended Data Fig. 5), 8 were expressed at 5 dpf. Two of these genes were  
82 differentially expressed, *csf1ra* and *gstp2* (Extended Data Table 1), and one had several  
83 mutations that fully segregated with the leakage phenotype, *spock1*. To test whether loss of any  
84 of these genes conferred the increased BBB permeability, we assessed tracer leakage in mosaic  
85 crispants (zebrafish larvae injected at the 1-cell stage with Cas9 protein and gene-specific  
86 sgRNAs) at 5 dpf and observed no BBB defects in 42 *gstp2* or 35 *csf1ra* crispants (data not  
87 shown). However, when we assessed BBB function in *spock1* crispants, we observed a strong  
88 leaky phenotype in 26% of larvae (26/100 injected fish; Fig. 1h #3) and moderate leakage in 53%  
89 (53/100 injected fish; Fig. 1h #1). Strikingly, a few of the crispants displayed BBB leakage  
90 restricted to one midbrain hemisphere (4/100 injected fish; Fig. 1h #2). *Spock1* encodes a  
91 secreted protein of unclear function named for its conserved protein domains: SPARC  
92 (Osteonectin), Cwcv And Kazal Like Domains Proteoglycan 1 protein (also known as Testican-  
93 1). *Spock1* has three predicted domains: 1) a Kazal-type serine protease inhibitor, 2) an  
94 extracellular SPARC calcium-binding region, and 3) a thyroglobulin type-1 repeat region, in  
95 addition to being decorated by both chondroitin sulfate (CS) and heparan sulfate (HS)  
96 glycosaminoglycan (GAG) chains (Fig. 1e)<sup>18,19</sup>. Deeper sequencing of *spock1* revealed a few  
97 point mutations in the SPARC calcium-binding domain in the leaky fish (Fig. 1g), hereafter  
98 referred to as *spock1*<sup>hm41/hm41</sup> mutants.  
99

100 To determine whether or not *Spock1* plays a conserved role in determining vertebrate BBB  
101 properties, we assessed BBB function in embryonic day 15.5 (E15.5) mice (Fig. 1i), when the  
102 cortex BBB is fully functional<sup>20</sup>. While wild type siblings confined both 550 Da Sulfo-NHS-Biotin  
103 (Fig. 1j) and 10 kDa Dextran (Fig. 1l) within the brain vasculature, *Spock1*<sup>-/-</sup> mice leaked both  
104 tracers into the cortex parenchyma (Fig. 1j-m, Extended Data Fig. 6). This increased BBB  
105 permeability was associated with increased expression of the plasmalemma vesicle-associated  
106 protein (PLVAP) (Extended Data Fig. 6), a structural protein that comprises the diaphragm in  
107 endothelial fenestrae and transcytotic vesicles<sup>21</sup>. When we repeated these leakage assays in  
108 adult mice, we observed full recovery in BBB function in *Spock1*<sup>-/-</sup> mice (Extended Data Fig. 7).  
109 This contrasts with adult zebrafish *spock1*<sup>hm41/hm41</sup> mutants, which continue to leak the serum  
110 protein into the brain (Extended Data Fig. 7), indicating species-specific differences in BBB  
111 maintenance.  
112

113 Given the necessity of *Spock1* in determining BBB function, we next wanted to assess where  
114 *spock1* was expressed during BBB development. Using HCR fluorescent *in situ* hybridization, we  
115 determined that *spock1* mRNA is expressed throughout the developing central nervous system,  
116 including the brain, retina and spinal cord (Extended Data Fig. 8), and that this expression is  
117 unaltered in *spock1*<sup>hm41/hm41</sup> mutants (Extended Data Fig. 9). Closer examination of the fluorescent  
118 signal revealed co-localization with the neuronal marker *elavl3* and not the vascular marker *kdrl*  
119 (Fig. 1n), similar to its predominantly neural expression in the developing mouse CNS<sup>22</sup>. Prior  
120 single-cell RNA sequencing (scRNA-seq) data<sup>23</sup> and our own also showed expression of *spock1*  
121 primarily in neurons and never in vascular endothelial cells (Extended Data Fig. 10). Taken  
122 together, these data indicate that we have identified a neuronal signal, *Spock1*, that plays a  
123 conserved role in establishing endothelial BBB properties during development without altering  
124 vascular patterning.  
125

126 To test the ability of *Spock1* to rescue the mutant leakage phenotype, we injected recombinant  
127 human SPOCK1 (rSPOCK1) protein directly into the brain of mutant larvae at 5 dpf and assessed  
128 brain permeability at 6 dpf. While control animals injected with 1 kDa AF 405 NHS Ester

129 maintained high levels of brain permeability (Fig. 2a), larvae that received at least 2.3 ng of  
130 rSPOCK1 per mg fish body weight showed a 50% reduction in brain permeability following a  
131 single dose (Fig. 2b,c). These results indicate that the leakage observed in the leaky mutants is  
132 due to loss of Spock1 activity and that SPOCK1 is able to act non-cell autonomously to rescue  
133 the mutant BBB leakage, as these injections were targeted broadly to the neural tissue rather  
134 than the endothelial cells.

135  
136 To determine the range of the Spock1 signal, we performed cell transplantation experiments in  
137 zebrafish embryos and assessed tracer leakage in relationship to the closest transplanted cells  
138 at 5 dpf (Fig. 2d). When we transplanted wild type cells into wild type host embryos, we observed  
139 a negligible level of tracer accumulation in the brain parenchyma regardless of the proximity of  
140 the nearest donor cell (Fig. 2f). In contrast, when we transplanted *spock1*<sup>hm41/hm41</sup> mutant cells into  
141 mutant host embryos, we observed high levels of tracer accumulation in the parenchyma  
142 regardless of the proximity of the nearest donor cell (Fig. 2f). Strikingly, when we transplanted  
143 wild type cells into *spock1* mutant hosts, we observed a complete rescue of the mutant leakage  
144 if the wild type donor cell was within 10  $\mu$ m of a blood vessel and no rescue if the donor cell was  
145 more than 20  $\mu$ m away (Fig. 2e,f), indicating that the functional range of Spock1 falls between 10  
146 and 20  $\mu$ m. Importantly, wild type cells could rescue leakage in mutant hosts when they  
147 differentiate as neurons but not endothelial cells (Fig. 2e).

148  
149 To assess the subcellular mechanism of increased BBB permeability in *spock1*<sup>hm41/hm41</sup> mutants,  
150 we injected electron-dense NHS-gold nanoparticles (5 nm) into circulation, followed by  
151 transmission electron microscopy (TEM) imaging in 7 dpf *spock1* mutant and wildtype siblings  
152 (Fig. 3). These TEM leakage assays revealed no alterations in the cellular composition of the  
153 neurovascular unit in *spock1* mutants, with endothelial cells and pericytes sharing a basement  
154 membrane that is surrounded by neurons and glia (Fig. 3a-b). A modest impairment in tight  
155 junction function was observed in *spock1* mutants (52/59 functional tight junctions) compared to  
156 wild type siblings (57/57; Fig. 3b). However, *spock1* mutants had a significant increase in both  
157 small (<100 nm diameter) non-clathrin coated vesicles (Fig. 3b, d) and large (>200 nm diameter)  
158 vesicles (Fig. 3c, e) suggesting that the leakage results primarily from an increase in vesicular  
159 trafficking across endothelial cells. In addition to the increase in total large vesicular abundance  
160 in *spock1* mutants, we also observed several of these large vesicles fused to the abluminal  
161 membrane in multiple larvae with a few examples of the gold nanoparticles visibly spilling into the  
162 endothelial basement membrane (Fig. 3c). Although pericyte coverage of the endothelium was  
163 unaltered (Extended Data Fig. 2), *spock1* mutants displayed overall thinner pericyte-endothelial  
164 basement membranes with several pericytes having long stretches of direct contact on endothelial  
165 cells (Fig. 3f-g). These data suggest that loss of Spock1 function alters the critical pericyte  
166 extracellular interactions with endothelial cells, resulting in loss of BBB properties as observed in  
167 pericyte-deficient mice and zebrafish<sup>24-27</sup>.

168  
169 To determine how Spock1, a neuronally produced and secreted proteoglycan, signals to and  
170 regulates brain endothelial cell BBB properties, we turned to scRNA-seq of dissected 5 dpf  
171 *spock1*<sup>hm41/hm41</sup> mutant and wild type brains, allowing us to reveal all cell type specific molecular  
172 changes occurring in the mutant brains. With Leiden clustering of the scRNA-seq data we defined  
173 cell clusters containing neurons, glial, and vascular cell types (Extended Data Fig. 10). We  
174 performed differential gene expression (DGE) analysis for each cluster and did not observe any  
175 changes in the neuronal or glial populations, but did observe significant changes in the vascular  
176 cluster (Extended Data Table 2). When we subclustered the vascular population, we were able to  
177 resolve endothelial cells, pericytes and vascular smooth muscle cells (vSMCs; Fig. 4a). Due to  
178 the low vascular cell numbers present in the scRNA-seq data, we prioritized candidate genes for  
179 subsequent validation by their fold-change in gene expression and not statistical significance.

180 These analyses suggested molecular changes in the mutant endothelial cells indicative of a leaky  
181 phenotype, with increased expression of *plvapb* and decreased expression of the tight junction  
182 protein *cldn5b* (Fig. 4b, Extended Data Table 3), as expected from the TEM analyses.  
183 Interestingly, *spock1* mutants had decreased expression of the melanoma cell adhesion molecule  
184 *mcamb* (also known as CD146) in both endothelial cells and pericytes (Fig. 4b-c). This decreased  
185 expression in the vasculature was validated by HCR FISH, with minimal expression in mutant  
186 midbrain pericytes but normal levels in the hindbrain pericytes, which maintain BBB function in  
187 *spock1<sup>hm41/hm41</sup>* mutants (Fig. 4d-g). CD146 has previously been shown to be required for BBB  
188 integrity, as *CD146<sup>-/-</sup>* mice exhibit BBB breakdown due to decreased pericyte coverage and  
189 downstream loss of endothelial expression of *Cldn5*<sup>28</sup>.

190  
191 In summary, Spock1 is a secreted, neuronally expressed signal that regulates BBB permeability  
192 in zebrafish and mouse without altering vascular patterning. Mechanistically, this work suggests  
193 a model whereby Spock1 regulates vascular expression of *mcamb*, whose main role is to ensure  
194 vascular cell connectivity, which in turn regulates vesicular transport across endothelial cells.  
195 Thus, loss of Spock1 function contributes to increased BBB permeability in part due to disruption  
196 of critical pericyte-endothelial cell contacts required for the establishment and maintenance of  
197 BBB properties. Together this work reveals how signals from the brain microenvironment can  
198 regulate the vasculature to give rise to the special properties of the BBB and provides new targets  
199 for its therapeutic modulation.

## 200 201 **Acknowledgments**

202 We thank members of the Megason laboratory for data discussion and comments on the  
203 manuscript; Dr. Zach O’Brown for discussions and comments on the manuscript; Ignas Mazelis  
204 for single cell demultiplexing software; the HMS Single Cell Core for single cell library preparation;  
205 Dr. Bela Anand-Apte (Cleveland Clinic) for providing the transgenic *l-fabp:DBP-EGFP* fish line  
206 (Xie et al., 2010) and Dr. Leonard Zon for providing the transgenic *Tg(kdrl:HRAS-mCherry)* line;  
207 and the HMS Electron Microscopy Core Facility, with special thanks to Louise Trakimas for all of  
208 her assistance in preparing the TEM samples. This work was supported by the Damon Runyon  
209 Cancer Foundation (N.M.O.), NIH R01HD096755 (S.G.M), an Allen Distinguished Investigator  
210 Award (C.G.), NIH R35NS116820 (C.G), and partially supported by Faculty Scholar grant from  
211 the Howard Hughes Medical Institute (C.G.). C.G. is an investigator of the Howard Hughes  
212 Medical Institute.

## 213 214 215 **Author Contributions**

216  
217 N.M.O., S.G.M. and C.G. conceived the project and designed experiments. N.M.O. performed all  
218 experiments and analyzed most data with the exception of the scRNA-seq which was performed  
219 in collaboration with and analyzed by N.B.P. and A.M.K. U.H. provided the *Spock1<sup>-/-</sup>* mice. N.M.O.,  
220 S.G.M. and C.G wrote the manuscript.



221 **Fig. 1. The neuronal signal Spock1 plays a conserved role in establishing BBB function.**

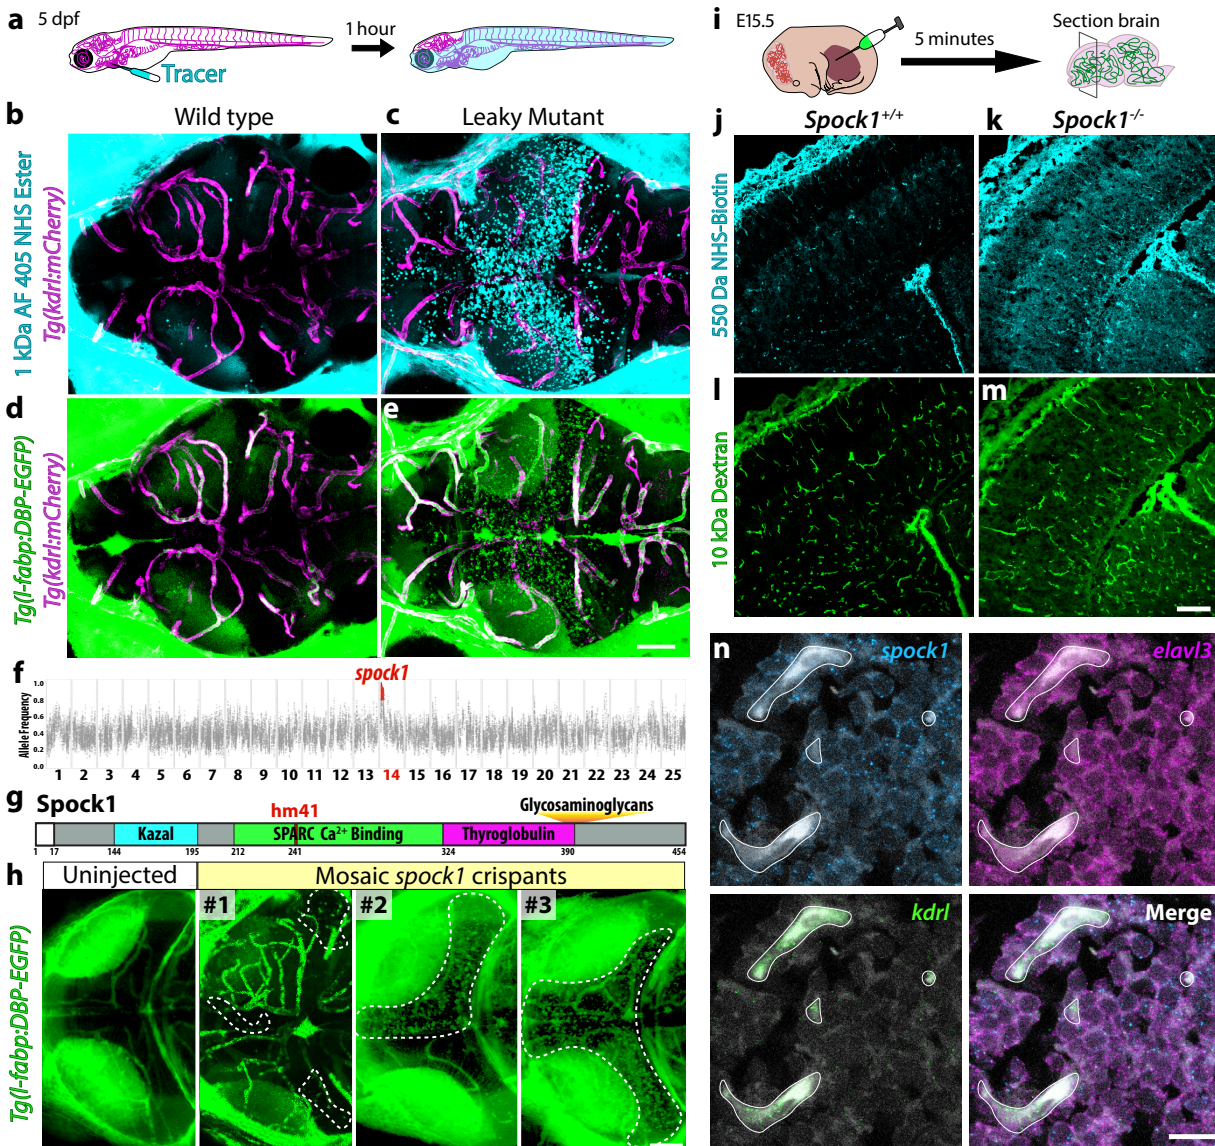

222  
 223 **a-e**, Fluorescent tracer leakage assays in 5 dpf zebrafish reveal BBB leakage in the forebrain and  
 224 midbrain of both injected 1 kDa Alexa Fluor (AF) 405 NHS Ester (**c**) and 80 kDa DBP-EGFP (**e**)  
 225 of mutant larvae compared to wild type controls (**b**, **d**). **f-g**, Linkage mapping of leaky phenotype  
 226 reveals tight linkage to *spock1* on chromosome 14. *Spock1*<sup>hm41</sup> mutants have several point  
 227 mutations in the SPARC domain of Spock1 (**g**). **h**, CRISPR mutagenesis confirms that loss of  
 228 Spock1 function results in increased BBB leakage in the mosaic *spock1* crispants. **i-m**, Tracer  
 229 leakage assays in E15.5 *Spock1*<sup>-/-</sup> mice (**i**) reveal a conserved role for Spock1 in regulating BBB  
 230 function, as *Spock1*<sup>-/-</sup> mice also leak injected 550 Da NHS-Biotin (**k**) and 10 kDa Dextran (**m**)  
 231 tracers into the brain parenchyma. **n**, HCR fluorescent *in situ* hybridization reveals *spock1* (blue)  
 232 localization within *elavl3* (magenta) positive neurons but not *kdrl* expressing blood vessels  
 233 (green). Tissue and red blood cell autofluorescence is shown in grey. Scale bars represent 100  
 234  $\mu$ m (**e**, **h**, **m**) and 10  $\mu$ m (**n**).  
 235

236 **Fig. 2. Spock1 regulates endothelial cells non-autonomously.**

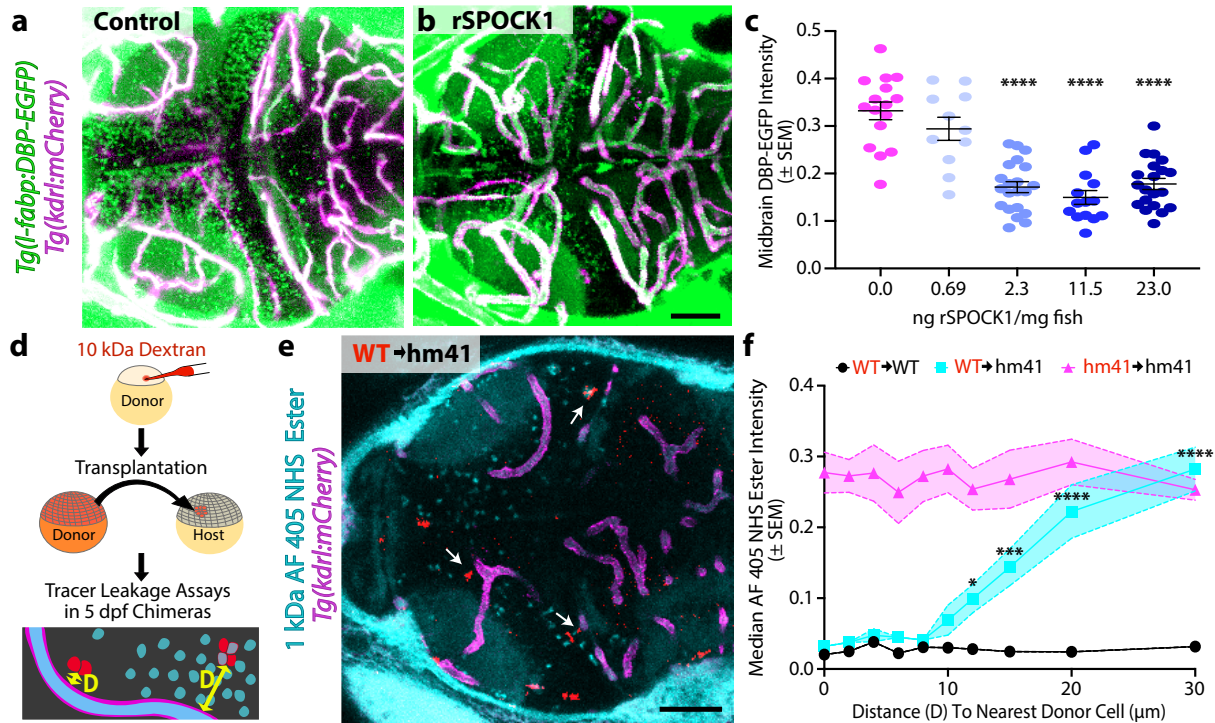

237 **a-b**, A single intracranial injection of human rSPOCK1 into the brain at 5 dpf reduces mutant  
 238 leakage at 6 dpf about 50% (**b**) compared to controls injected with AF 405 NHS Ester alone (**a**).  
 239 **c**, Quantification of DBP-EGFP in the 6 dpf brain parenchyma after intracranial injection of  
 240 rSPOCK1. **d**, Schematic of transplantation experiments where donor embryos labeled with 10  
 241 kDa Dextran (red) at the single cell stage are transplanted into unlabeled host embryos at sphere  
 242 stage. Leakage of the injected 1 kDa AF 405 NHS Ester (turquoise) into the midbrain parenchyma  
 243 is then measured in relationship to the distance (D) from the blood vessel to the nearest donor  
 244 cell in the 5 dpf chimeric larvae. **e**, Representative dorsal maximum intensity projection image of  
 245 a chimeric larva with transplanted wild type donor cells (red) into a Spock1<sup>hm41/hm41</sup> mutant host  
 246 (WT→hm41). Arrows point to several instances of local rescue of tracer (turquoise) leakage when  
 247 the wild type donor cells are close but not directly contacting the mutant vasculature (magenta).  
 248 **f**, Quantification of the NHS leakage in WT→WT (black line) and hm41→hm41 (magenta line)  
 249 reveals no change in tracer leakage in relationship to the nearest donor cell, with wild type fish  
 250 confining the tracer and mutant fish leaking the tracer. However WT→hm41 (turquoise line)  
 251 transplants reveal a full rescue of the leakage in the mutant background when the transplanted  
 252 cell is within 10 µm of a blood vessel and no effect if the donor cell is further than 20 µm from the  
 253 vessel. Scale bars represent 50 µm. \* p=0.0495, \*\*\* p=0.0001, \*\*\*\* p<0.0001 by 2way ANOVA  
 254 compared to uninjected control mutants in **c** and WT→WT in **f**.  
 255



256 **Fig. 3. Spock1 mutants have increased endothelial vesicles.**

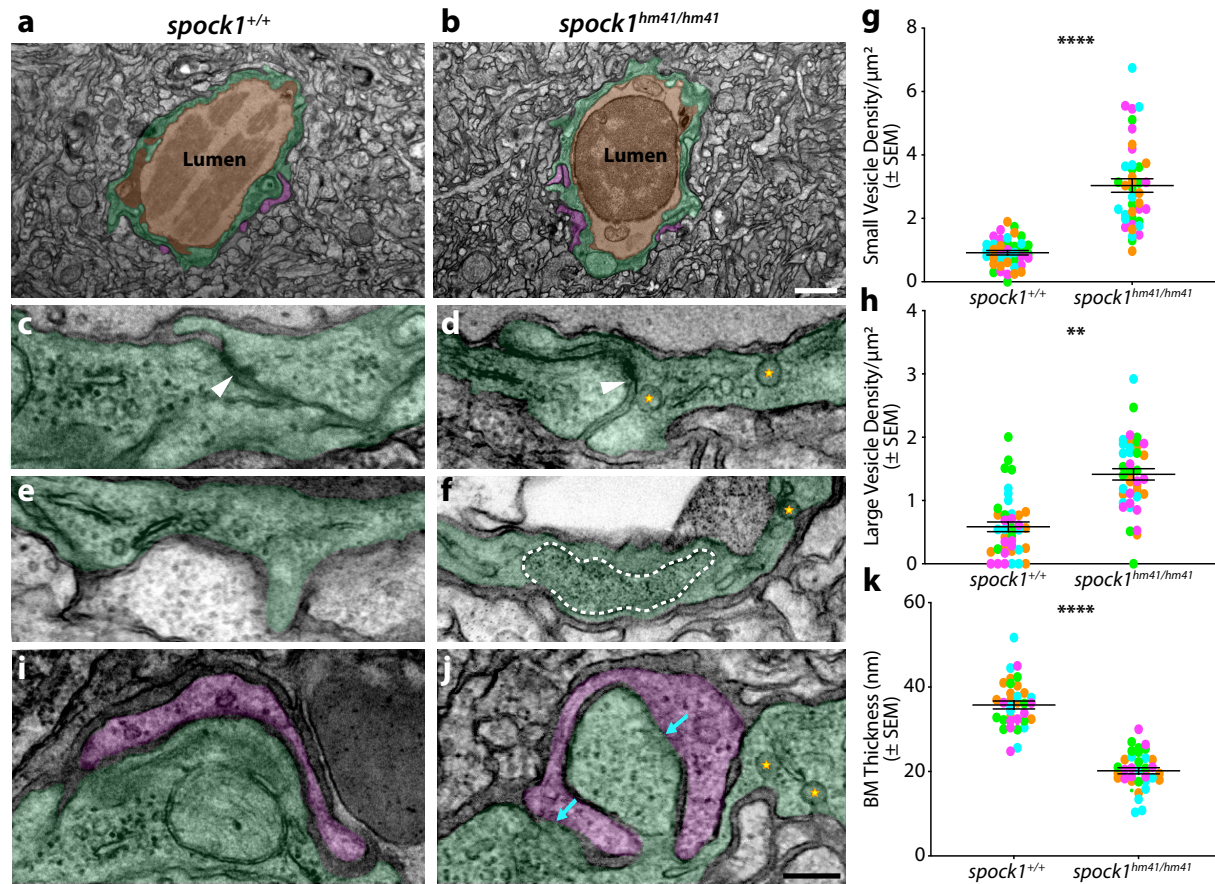

257 **a-b**, The neurovascular unit remains intact in *spock1*<sup>hm41/hm41</sup> mutants (**b**) with a continuous single  
 258 layer of endothelial cells (pseudocolored green) enclosing the lumen (pseudocolored orange) and  
 259 in close contact with pericytes (pseudocolored purple). **c-h**, The majority of tight junctions (white  
 260 arrowheads) are functionally restrictive in the *spock1*<sup>hm41</sup> mutant endothelial cells (88%). Mutant  
 261 endothelial cells displayed a significant increase in vesicular density, including both small flask  
 262 shaped vesicles (yellow stars, **g**) and larger vesicles greater than 200 nm in diameter (outlined  
 263 by white dashed line in **f**, **h**). **i-k**, While pericyte coverage is unaltered in *spock1*<sup>hm41</sup> mutants, the  
 264 pericyte-endothelial cell interactions are altered in the mutants, with several instances of direct  
 265 pericyte-endothelial cell contact (turquoise arrows) and overall diminished basement membrane  
 266 thickness (**k**). Scale bars represent 1  $\mu\text{m}$  (**b**) and 200 nm (**j**). N=4 fish, each marked by a unique  
 267 color, with 10 vessels per fish analyzed and depicted as individual points. \*\* p=0.0029, \*\*\*\*  
 268 p<0.0001 by nested t test.  
 269  
 270

271 **Fig. 4. *Spock1*<sup>hm41/hm41</sup> mutant vasculature have reduced expression of BBB regulators.**

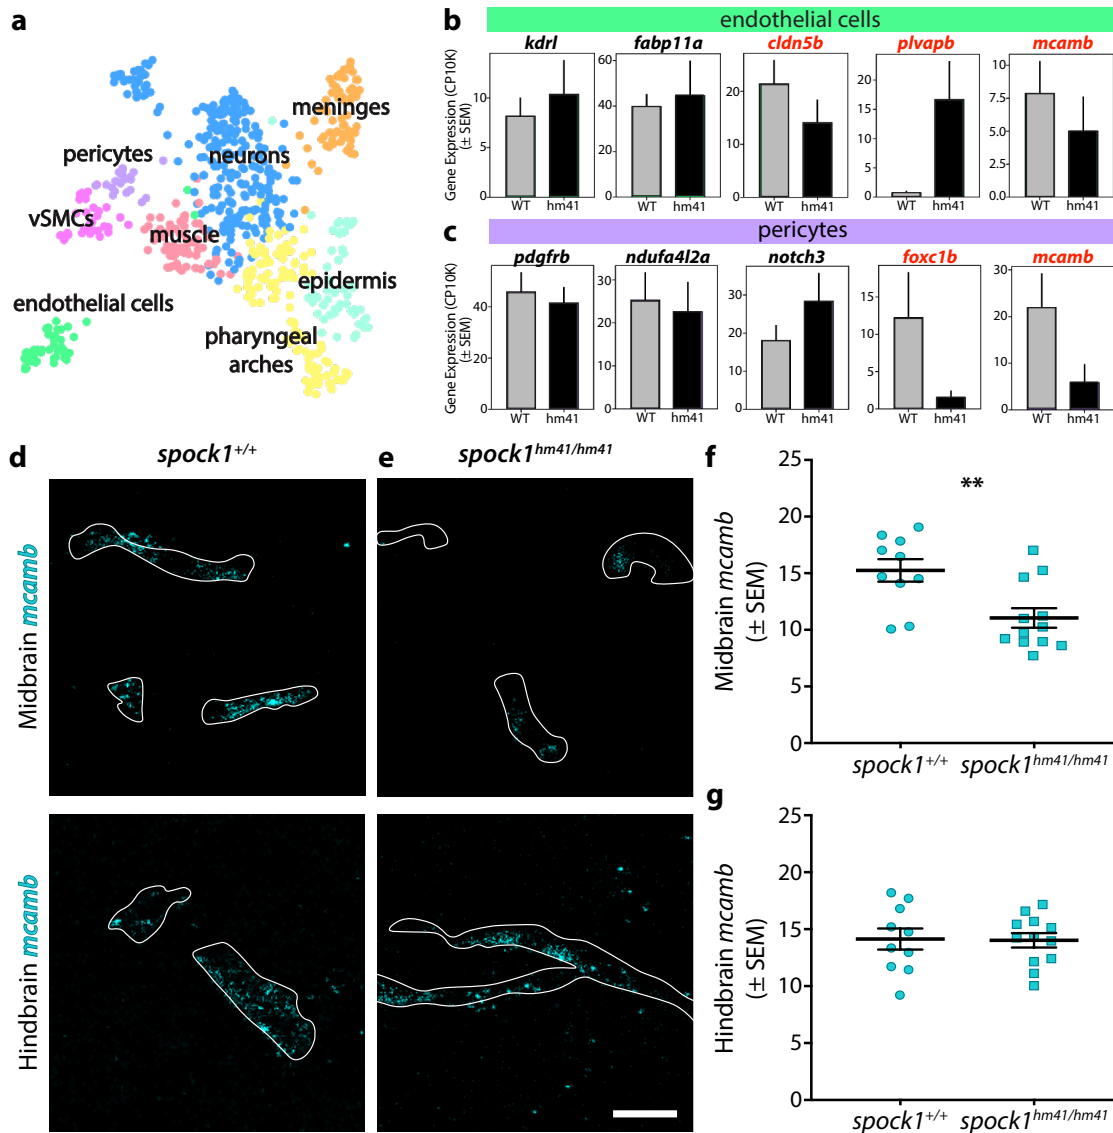

272 **a**, UMAP of the subclustered vascular cells separated by cell type, with pericytes (purple)  
 273 separating from vascular smooth muscle cells (vSMCs, pink) and endothelial cells (green). **b-c**,  
 274 Mean gene expression in wild type (WT, grey bars) and *spock1* mutant (hm41, black bars)  
 275 endothelial cells (**b**) and pericytes (**c**). Error bars represent SEM. Mutants appear to have lower  
 276 levels of *mcamb* in both pericytes and endothelial cells. **d-g**, HCR FISH reveals strong expression  
 277 of *mcamb* (turquoise) in wild type vasculature (**d**), both in the midbrain and hindbrain. *Spock1*  
 278 mutants have significantly reduced expression of *mcamb* in the midbrain (**e, f**), but normal levels  
 279 in the hindbrain (**g**), where no leakage is observed. Scale bar represents 10  $\mu$ m. \*\* p=0.0044 by  
 280 unpaired t test.  
 281  
 282



## 283 **Materials and Methods**

284

### 285 **Zebrafish Strains and Maintenance**

286 Zebrafish were maintained at 28.5°C following standard protocols<sup>29</sup>. All zebrafish work was  
287 approved by the Harvard Medical Area Standing Committee on Animals under protocol number  
288 IS00001263-3. Adult fish were maintained on a standard light-dark cycle from 8 am to 11 pm.  
289 Adult fish, age 3 months to 2 years, were crossed to produce embryos and larvae. For imaging  
290 live larvae, 0.003% phenylthiourea (PTU) was used beginning at 1 dpf to inhibit melanin  
291 production. These studies used the AB wild-type strains and the transgenic reporter strains Tg(*l-*  
292 *fabp:DBP-EGFP*)<sup>Iri500 16</sup>, (Tg(*kdrl:HRAS-mCherry*)<sup>s896 30</sup>, abbreviated as Tg(*kdrl:mCherry*) in the  
293 text, TgBAC(*pdgfrb:EGFP*)<sup>ncv22Tg 31</sup>, abbreviated as Tg(*pdgfrb:EGFP*).

294

### 295 **Spock1<sup>hm41</sup> Mutants**

296 *Spock1<sup>hm41</sup>* mutants were maintained in the double transgenic Tg(*l-fabp:DBP-EGFP*;  
297 *kdrl:mCherry*) background. Heterozygous fish were intercrossed for all leakage assays, with the  
298 exception of the time lapse microscopy experiments, where a heterozygous fish was crossed to  
299 a homozygous mutant, and the cell transplantation experiments, where homozygous mutants  
300 were in-crossed. All larvae were imaged prior to genotyping to identify wild type and mutant fish.  
301 The *spock1<sup>T241A</sup>* mutant line was genotyped using 5'- ACTGAGTGTTATTTTGTTCATTGTGC-3'  
302 and 5'-TGATGCTGATCTGAGAAGTTTAGCC-3' primers followed by a HaeIII restriction digest,  
303 which does not digest the wild-type product (327 bp).

304

### 305 **Fluorescent Zebrafish Tracer Injections**

306 Larvae were immobilized with tricaine and placed in an agarose injection mold with their hearts  
307 facing upwards. 2.3 nl of Alexa Fluor 405 NHS Ester (Thermo Fisher: A30000) or Alexa Fluor 647  
308 10 kDa Dextran (Thermo Fisher: D22914) fluorescently conjugated tracers (10 mg/ml) were  
309 injected into the cardiac sac using Nanoject II (Drummond Scientific, Broomall, PA). Larvae were  
310 then mounted with 1.5% low gelling agarose (Sigma: A9414) in embryo water on 0.17 mm  
311 coverslips and imaged live within 2 hours post injection on a Leica SP8 laser scanning confocal  
312 microscope using the same acquisition settings with 1 μm z-steps using a 25x water immersion  
313 objective. All quantification was performed on blinded image sets. For static images, parenchymal  
314 fluorescent tracer intensity was measured using ImageJ in the entire regional parenchyma outside  
315 of the vasculature in 60 μm thick maximum intensity projections of the larval brains. These  
316 projections began on average 15 μm below the mesencephalic vein to reduce the effects of  
317 potential leakage diffusion from the surface vessels and had the vasculature masked and  
318 removed for intensity quantification. These parenchymal tracer intensity values were then  
319 background subtracted and normalized to the tracer intensity within the vasculature to account  
320 for differential amounts of circulating tracer between fish. For time lapse imaging, Dextran  
321 intensity was measured in six parenchymal regions of average intensity projections of the time  
322 lapse videos and averaged as a single value per fish and similarly normalized to the average  
323 blood vessel luminal fluorescence intensity at each time point.

324

### 325 **Linkage Mapping**

326 Larvae from 2 separate crosses were screened for leakage of DBP-EGFP at 5 dpf and pooled  
327 into 3 groups of 5 to 6 leaky or wild type heads. RNA was extracted from the pools using RNeasy  
328 mini kit and ribo-depleted. RNA sequencing libraries were prepared using Wafergen Directional  
329 RNA-Seq kits and sequenced on NextSeq High-Output sequencers producing 75 bp paired end  
330 reads. Reads were mapped to the GRCz11 genome using tophat and bowtie2. Linkage mapping  
331 was performed on the mapped reads using RNAmapper<sup>17</sup> with the following specifications:  
332 zygosity=25, coverage=1, linkedRatio=0.96, neighbors=10. Differential gene expression analysis  
333 was performed on these libraries using rsem<sup>32</sup>.

334

### 335 **CRISPR Mutants**

336 *Gstp2* crispant fish were generated by injection of Cas9 protein and 3 guide RNAs (5'-  
337 CAGCTGCCTAAATTTGAAGA-3', 5'-GCGTTGGAACTTACACATG-3', and 5'-GTGAGAGTGT  
338 AGGGAGCCAC-3') into 1-cell fertilized double transgenic Tg(*l-fabp:DBP-EGFP; kdrl:mCherry*)  
339 embryos. *Csf1ra* crispant fish were generated similarly with 4 guide RNAs (5'-  
340 CTGCTACCAACAGCCGAG-3', 5'-GTGTCTTCTGACCGACCCGG-3', 5'-CTCGTCTTCATGCT  
341 TCACG-3', and 5'-AGTGACACCTTCTCCATGG-3'), as were *spock1* crispants (5'-GTAGCCGAC  
342 AGAAAGAGAGG-3', 5'-GAGTCGCAGGAGTTGAACAG-3', 5'-GACAGTGAACCTTCATGCAG-  
343 3', and 5'-TGTCCGGGCAGGCAAGGGCA-3'). F0 crispants were analyzed for leakage of the  
344 DBP-EGFP tracer outside of the *kdrl:mCherry* labeled vasculature at 5 dpf.

345

### 346 **HCR Fluorescent In Situ Hybridization (FISH)**

347 HCR RNA in situ hybridization (Molecular Instruments) experiments on 14  $\mu$ m cryosections of  
348 fixed 5 dpf larvae were performed as previously described<sup>15,33</sup>. Briefly, sections were air dried and  
349 re-fixed in 4% paraformaldehyde in PBS for 10 minutes at room temperature. Following fixation,  
350 slides were washed in PBS and then permeabilized using 1  $\mu$ g/ml Proteinase K (ThermoFisher)  
351 for 5 minutes, followed by PBS washes and re-fixation. Tissues were further permeabilized by an  
352 ethanol dehydration series of 50%, 70% and two rounds of 100% ethanol and air dried for 5  
353 minutes. Dried slides were put into pre-hyb solution for at least 10 minutes at 37°C. Subsequently,  
354 the probes for *spock1*, *kdrl*, *elavl3*, and *mcamb* were added to the slides at a final concentration  
355 of 4 nM to hybridize overnight at 37°C. The next day, slides were washed with a series of wash  
356 buffer to 5x SSCT (5x SSC with 0.1% Tween 20). Excess liquid was then removed and samples  
357 were immersed in amplification buffer at room temperature for 30 minutes prior to hairpin  
358 amplification, which occurred overnight at room temperature. Slides were then washed in 5x  
359 SSCT, washed in 5x SSC and mounted with Fluoromount-G (Electron Microscopy Sciences).

360

361 Images were collected on a Leica SP8 laser scanning confocal microscope using the same  
362 acquisition settings with 0.2  $\mu$ m z-steps using a 25x water immersion objective or a 63x oil  
363 immersion lens. All quantification was performed on blinded image sets of sections from a single  
364 slide treated with all of the same reagents and imaged on the same day. To measure levels of  
365 *mcamb* expression, we used ImageJ to first subtract tissue autofluorescence (captured in the 405  
366 channel) from the *mcamb* expression in maximum intensity projections and then the vasculature  
367 was manually traced and average intensity was measured.

368

### 369 **Mouse Maintenance**

370 *Spock1*<sup>-/-</sup> knockout mice were obtained from Ursula Hartmann's lab and were backcrossed to and  
371 maintained on a C57Bl/6 background. Mice were genotyped with primers 5'-GCCACTGGTCATT  
372 GTCTAGG-3', 5'- TGTGCCCAGTCATAGCCGAATAGCCTCTCC-3', and 5'-GCTTGAGGTAGC  
373 CCTGTTGTCACC-3' using KAPA HiFi Hotstart polymerase (Roche:KK2602). This PCR reaction  
374 produced a 185 bp wild type band and a 750 bp knockout band in heterozygous animals. All  
375 animals were treated according to institutional and US National Institutes of Health (NIH)  
376 guidelines approved by the Institutional Animal Care and Use Committee (IACUC) at Harvard  
377 Medical School under protocol IS00000045-6.

378

### 379 **Mouse Embryonic Tracer Injection**

380 Heterozygous *Spock1*<sup>+/-</sup> mice were intercrossed and used for the tracer leakage assays  
381 performed at embryonic day 15.5 (E15.5) as previously described<sup>20</sup>. In brief, 5  $\mu$ l of tracer cocktail  
382 (10 mg/ml EZ-Link NHS-Biotin (Thermo Fisher: 20217) and 10 kDa Dextran Alexa Fluor 488  
383 (Thermo Fisher: D22910)) was injected into the liver of each embryo and allowed to circulate for  
384 5 minutes. Embryonic heads were fixed by immersion in 4% paraformaldehyde overnight at 4°C

385 and then frozen in TissueTek OCT (Sakura). 20  $\mu\text{m}$  thick sections were then collected and  
386 immunostained with Streptavidin Alexa Fluor 405 (1:200; Thermo Fisher: S32351) and rat anti-  
387 PLVAP (1:200; BD Biosciences:553849). All embryos were injected blind before genotyping.

388

### 389 **Transplantation**

390 Donor embryos were injected with 2.3 nl of 10 mg/ml Alexa Fluor 647 10 kDa Dextran (Thermo  
391 Fisher: D22914) at the 1-cell stage to distinguish them from host cells. Following injection,  
392 embryos were incubated at 28.5°C until transplantation. Host and donor embryos were  
393 dechorinated with 1 mg/ml Pronase (Roche:11459643001) at oblong stage and transferred to  
394 transplantation agarose dishes in 1/3 Ringer's buffer. Unfertilized or injured embryos were  
395 discarded. To generate clonal sources secreting wild type or mutant Spock1, approximately 40–  
396 80 cells were transplanted from sphere stage dextran labeled donor embryos into sphere stage  
397 wild type and mutant hosts (similar to previous studies<sup>34</sup>). Embryos recovered overnight in 1/3  
398 Ringer's buffer and were subsequently transferred to Danieau Buffer with PTU. Tracer injections  
399 were performed at 5 dpf, as described above, with 1 kDa Alexa Fluor 405 NHS Ester. Blinded  
400 image sets were analyzed using ImageJ. Individual larval brains were segmented into 10  $\mu\text{m}$  thick  
401 maximum intensity projections spanning the entire brain. Average NHS tracer intensity was  
402 measured in 10  $\mu\text{m}$  wide swaths connecting donor cells to the nearest blood vessel and  
403 normalized to average blood vessel tracer intensity. The median tracer intensity for a given  
404 distance (D) to the nearest donor cell was calculated for each individual fish.

405

### 406 **Transmission Electron Microscopy (TEM)**

407 Larvae (7 dpf) were anesthetized with tricaine and injected with 2.3 nl of 5 nm NHS-activated gold  
408 nanoparticles (Cytodiagnostics: CGN5K-5-1,  $\sim 1.1^{14}$  particles/ml in PBS) just as for the fluorescent  
409 tracer injections. After 5 minutes of circulation, the larvae were initially fixed by immersion in 4%  
410 paraformaldehyde (VWR:15713-S) /0.1M sodium-cacodylate (VWR:11653). Following this initial  
411 fixation, larvae were further fixed for 7 days in 2% glutaraldehyde (Electron Microscopy Sciences:  
412 16320)/ 4% paraformaldehyde/ 0.1M sodium-cacodylate at room temperature. Following fixation,  
413 larvae were washed overnight in 0.1M sodium-cacodylate. Entire larval heads were post-fixed in  
414 1% osmium tetroxide and 1.5% potassium ferrocyanide, dehydrated, and embedded in epoxy  
415 resin. Ultrathin sections of 80 nm were then cut from the block surface and collected on copper  
416 grids. Grids were imaged using a 1200EX electron microscope (JEOL) equipped with a 2k CCD  
417 digital camera (AMT) and quantified using ImageJ (NIH). Vesicular density values were  
418 calculated from the number of non-clathrin coated small vesicles less than 100 nm in diameter or  
419 large vesicles greater than 200 nm in diameter per  $\mu\text{m}^2$  of endothelial area for each image  
420 collected. Average pericyte basement membrane (BM) thickness was quantified by measuring  
421 the total BM area divided by the length of the pericyte-endothelial contact. All images for analysis  
422 were collected at 12000x magnification. 10-15 vessels were quantified for each fish, with each  
423 color representing a different fish.

424

### 425 **Single-cell RNA-sequencing**

426

427 Larval zebrafish brains were dissected and split along the midbrain-hindbrain boundary in DMEM.  
428 Brains were dissociated using a modified protocol<sup>35</sup>. Briefly, chemical dissociations were  
429 performed at 30.5°C using a mixture of 0.25% Trypsin-EDTA, Collagenase/Dispase (8 mg/mL)  
430 and DNaseI (20  $\mu\text{g}/\text{mL}$ ) for 15-20 minutes with gentle pipetting every few minutes and quenched  
431 with 10% fetal bovine serum in DMEM. Samples were hashed using Multi-seq as previously  
432 described with slight modifications<sup>36</sup>. For each sample, 80 pmoles of lipid modified oligos (LMOs)  
433 were used to hash every 500k cells. The hashing reaction was quenched using 1% BSA in PBS  
434 and barcoded samples were subsequently pooled and washed with 1% BSA. The pooled cell  
435 mixture was resuspended in PBS + 0.1%BSA + 18% Optiprep at a final concentration of  $\sim 300\text{k}$

436 cells/mL prior to single-cell capture with inDrops. The Single-cell Core (SCC) at Harvard Medical  
437 School captured single-cell transcriptomes and prepared NGS libraries as previously described<sup>37</sup>  
438 with a target capture of 45k cells per experiment. A summary of dissected tissues and  
439 corresponding sequencing information are described in Table S4.

440  
441 Gene expression and hashtag libraries were mixed (9:1 ratio) and sequenced on an Illumina  
442 Nova-seq 6000 with the NovaSeq S2 kit. Reads were mapped onto the Zebrafish GRCz11  
443 Release 101 genome assembly using previously described methods<sup>38</sup>. Hashtags were identified  
444 using custom code available on: [https://github.com/AllonKleinLab/paper-](https://github.com/AllonKleinLab/paper-data/tree/master/OBrown2021_ZebrafishBBB)  
445 [data/tree/master/OBrown2021\\_ZebrafishBBB](https://github.com/AllonKleinLab/paper-data/tree/master/OBrown2021_ZebrafishBBB)

446  
447 Transcriptomes with greater than 350 UMIs were further filtered for viability by removing cells with  
448 >20% mitochondrial reads. Cell demultiplexing was performed manually by applying thresholds  
449 to delineate single cells from background and multiple populations. The resulting counts matrix  
450 was normalized to the mean UMIs per cell in the dataset.

451  
452 To visualize the data, we first mean-normalized the data and identified highly variable genes from  
453 the wild type AB and RNF datasets (minimum of 3 transcripts per cell, minimum of 3 cells  
454 expressing gene, minimum V-score percentile of 85%). We then Z-scored counts for each gene  
455 and performed principal component analysis (PCA) with 50 components. Cells from the spock1  
456 mutant libraries were projected into the same principal component subspace. A k-nearest  
457 neighbor graph (k=10) was generated based on the Euclidean distance in gene expression  
458 between cells within this subspace. The Leiden algorithm was used to cluster cells into  
459 subgroups<sup>39</sup>. The neighborhood graph was embedded and visualized using UMAP and the data  
460 was explored interactively with SPRING<sup>40</sup> to aid in cell cluster annotation.

461  
462 Cells belonging to the liver, pharyngeal arches, skin, and muscle were removed prior to differential  
463 gene expression (DGE) analysis. The filtered dataset was reanalyzed using the methods  
464 described above. The Wilcoxon rank-sum test was used to generate a list of potential genes that  
465 are differentially regulated (fold change > 2) between genotypes across each Leiden cluster  
466 (Table S2). Genes were only considered for DGE analysis if they were expressed in at least 5%  
467 of cells in a given cluster and had a minimum mean of 10 transcripts per cell. Cells belonging to  
468 the AB and RNF background were treated as a single wild type genotype for the analysis. The  
469 vascular cluster (Leiden 13) was subclustered and similarly analyzed for DGE (Table S3).

#### 470 471 **Data availability**

472  
473 The raw reads from the counts matrix and associated metadata from the single-cell experiments  
474 have been deposited to GEO. (**Accession #**)

475  
476 All code for the single-cell analysis is available as interactive Jupyter notebooks here:  
477 [https://github.com/AllonKleinLab/paper-data/tree/master/OBrown2021\\_ZebrafishBBB](https://github.com/AllonKleinLab/paper-data/tree/master/OBrown2021_ZebrafishBBB)

478  
479 Interactive exploration of the full single-cell data can be found here:  
480 [https://kleintools.hms.harvard.edu/tools/springViewer\\_1\\_6\\_dev.html?client\\_datasets/2021\\_OBr](https://kleintools.hms.harvard.edu/tools/springViewer_1_6_dev.html?client_datasets/2021_OBrown/2021_OBrown)  
481 [own/2021\\_OBrown](https://kleintools.hms.harvard.edu/tools/springViewer_1_6_dev.html?client_datasets/2021_OBrown/2021_OBrown)

482  
483 Exploration of the vascular subcluster cells can be found here:  
484 [https://kleintools.hms.harvard.edu/tools/springViewer\\_1\\_6\\_dev.html?client\\_datasets/2021\\_OBr](https://kleintools.hms.harvard.edu/tools/springViewer_1_6_dev.html?client_datasets/2021_OBrown/Vasculature/2021_OBrown_Vasculature)  
485 [own\\_Vasculature/2021\\_OBrown\\_Vasculature](https://kleintools.hms.harvard.edu/tools/springViewer_1_6_dev.html?client_datasets/2021_OBrown/Vasculature/2021_OBrown_Vasculature)



486 Supplemental Figures

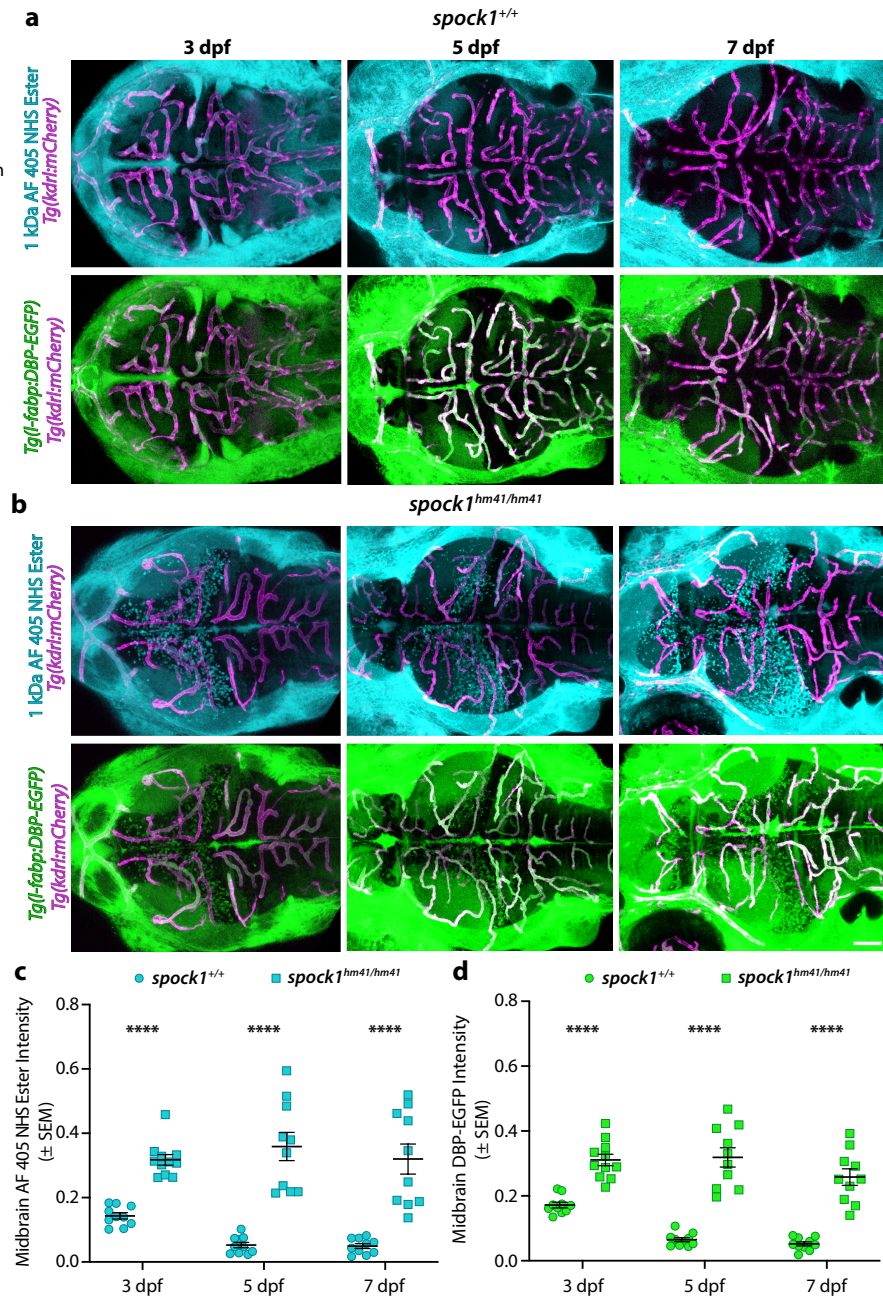

487  
 488 **Extended Data Fig. 1. *Spock1*<sup>hm41/hm41</sup> mutants display increased BBB permeability as early**  
 489 **as 3 dpf and maintain this leakage throughout larval development.** a, Developmental time  
 490 series of injected 1 kDa AF 405 NHS Ester (turquoise) and transgenic 80 kDa DBP-EGFP  
 491 (green) serum protein tracer in wild type fish reveals a functional sealing of the BBB by 5 dpf, as  
 492 previously observed.<sup>15</sup> b, *Spock1*<sup>hm41/hm41</sup> mutants leak both injected 1 kDa AF 405 NHS Ester and  
 493 the transgenic 80 kDa DBP-EGFP serum protein as early as 3 dpf, in the forebrain and midbrain.  
 494 This leakage pattern and intensity is maintained at 5 and 7 dpf. c-d, Quantification of AF 405 NHS  
 495 Ester (c) and DBP-EGFP (d) in the midbrain parenchyma outside of the vasculature. Scale bar  
 496 represents 100  $\mu$ m. \*\*\*\*  $p < 0.0001$  by 2way ANOVA compared to wild type controls.

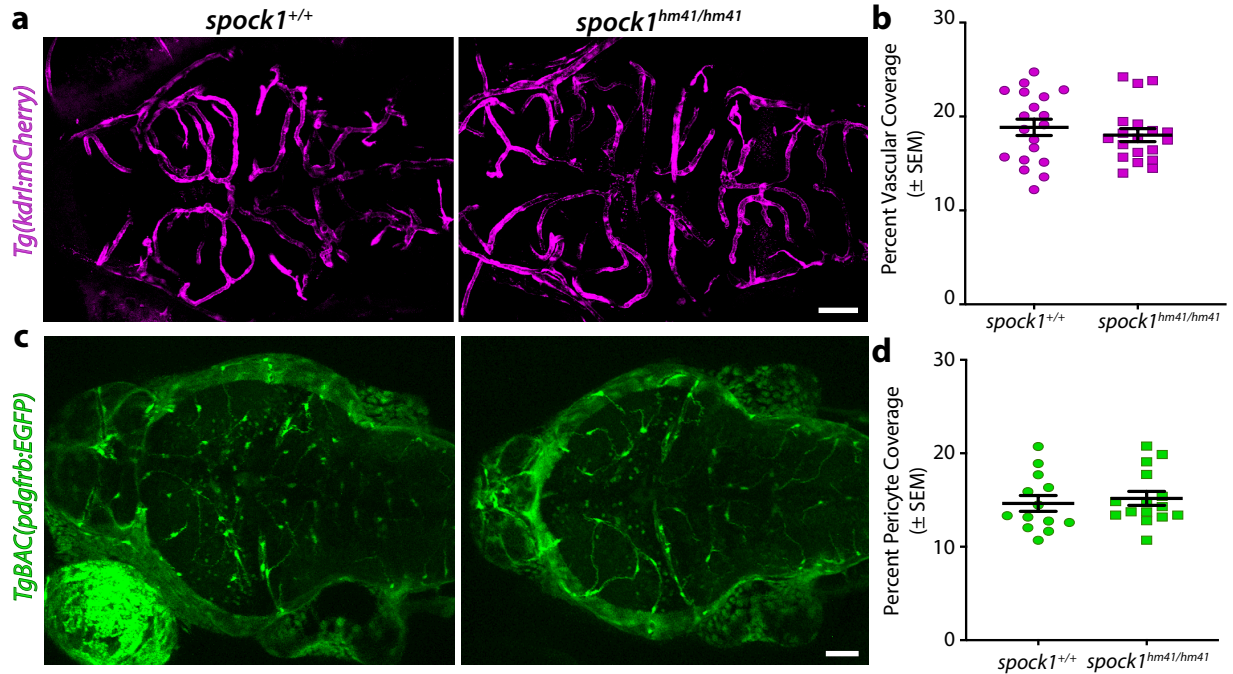

497  
498 **Extended Data Fig. 2. *Spock1*<sup>hm41/hm41</sup> mutants display normal vascular and pericyte**  
499 **coverage of the brain. a,** Dorsal maximum intensity projection of wild type (left) and mutant  
500 (right) brains with endothelial cells marked by the *kdrl:mCherry* transgene (magenta). **b,**  
501 Quantification of total vascular coverage of the brain as (*kdrl:mCherry*<sup>+</sup> area/total brain area), with  
502 each individual fish marked by a single point. **c,** Top down maximum intensity projection of wild  
503 type (left) and mutant (right) brains with pericytes marked by the *pdgfrb:EGFP* transgene (green).  
504 **d,** Quantification of total pericyte coverage of the vasculature (*pdgfrb:EGFP*<sup>+</sup> area/*kdrl:mCherry*<sup>+</sup>  
505 area), with each individual fish marked by a single point. T-test comparison reveals no significant  
506 difference between wild type and mutant fish for either vascular or pericyte coverage. Scale bars  
507 represent 50  $\mu$ m.

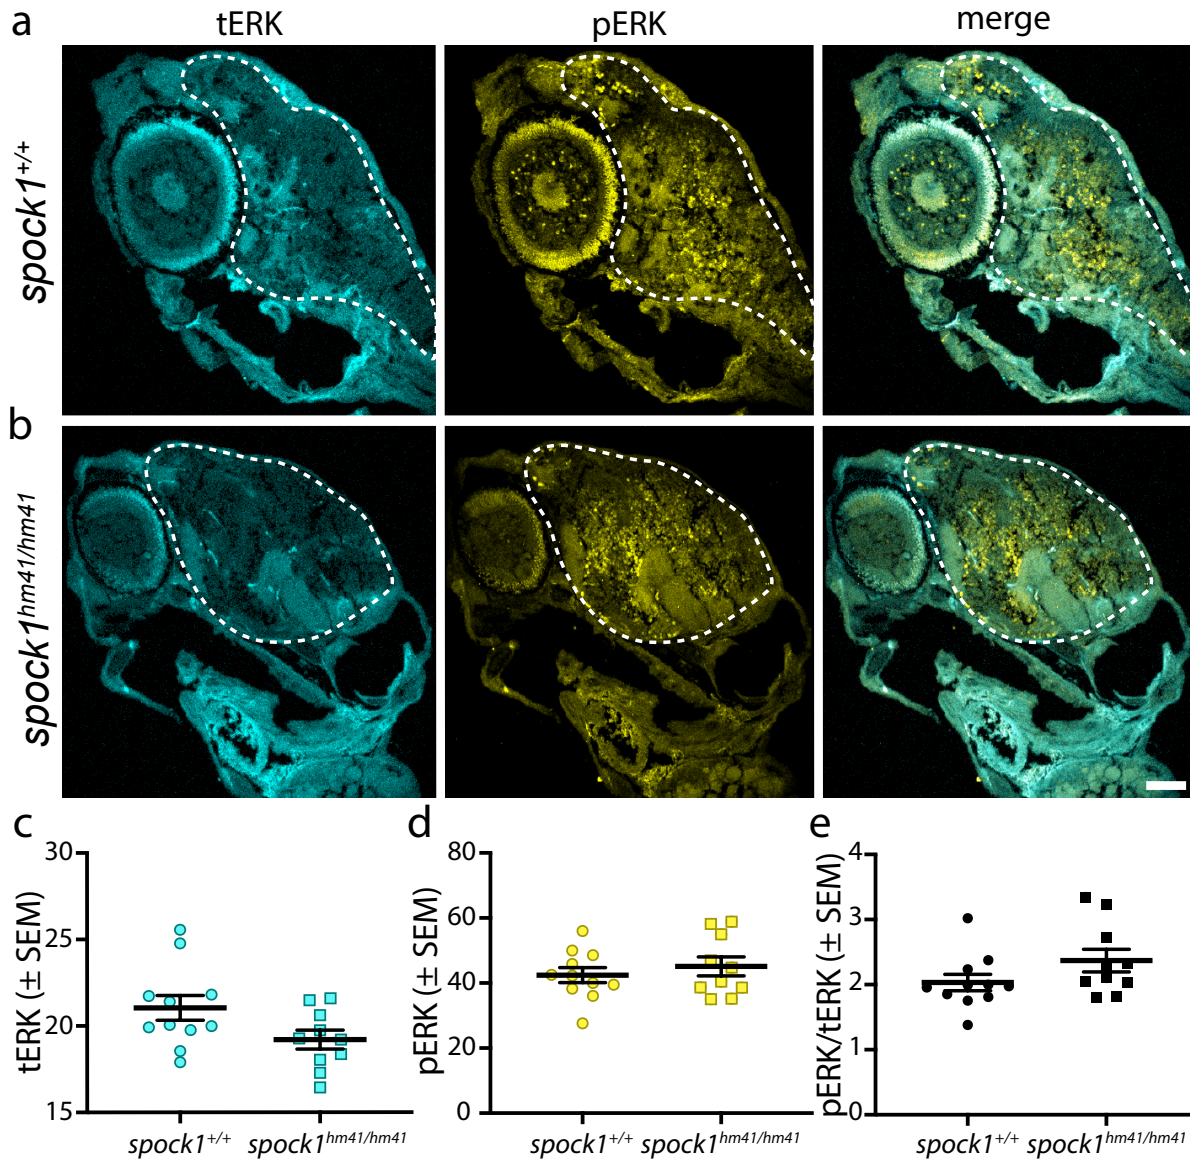

508  
509  
510  
511  
512  
513

**Extended Data Fig. 3. Neuronal activity is unaltered in *spock1* mutants.** **a-b**, Immunostaining for total ERK (tERK) and phosphorylated ERK (pERK) reveals no change in neuronal activity in *spock1* mutants (**b**) compared to wild type siblings (**a**). Brains are outlined by white dashed lines. **c-e**, Quantification of tERK (**c**), pERK (**d**) and the ratio of pERK/tERK (**e**) as a readout of neural activity with each individual fish marked by a single point. Scale bar represents 100  $\mu$ m.



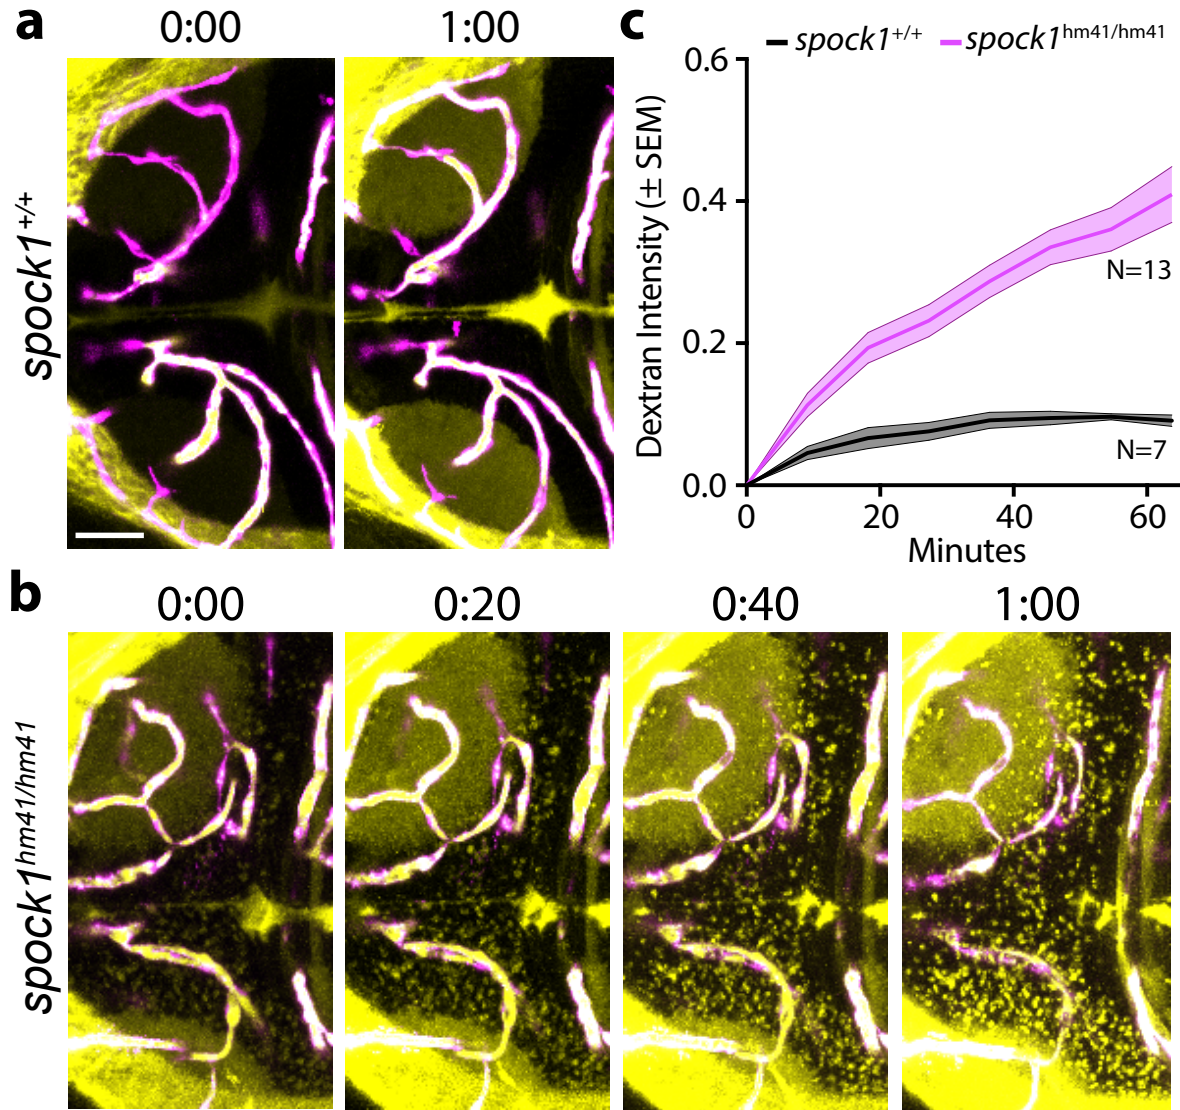

514  
515  
516  
517  
518  
519  
520

**Extended Data Fig. 4. Time lapse imaging reveals leakage dynamics in *spock1*<sup>hm41/hm41</sup> mutants.** **a-b**, Dorsal maximum intensity projection of a wild type (**a**) and *spock1*<sup>hm41/hm41</sup> mutant (**b**) midbrain reveals steady accumulation of 10 kDa Dextran (yellow) outside of the vasculature (magenta) over the course of one hour in *spock1* mutants. **c**, Quantification of Dextran accumulation in the midbrain parenchyma outside of the vasculature over time in wild type fish (black line) and *spock1*<sup>hm41/hm41</sup> mutants (magenta line). Scale bar represents 50  $\mu$ m.

521

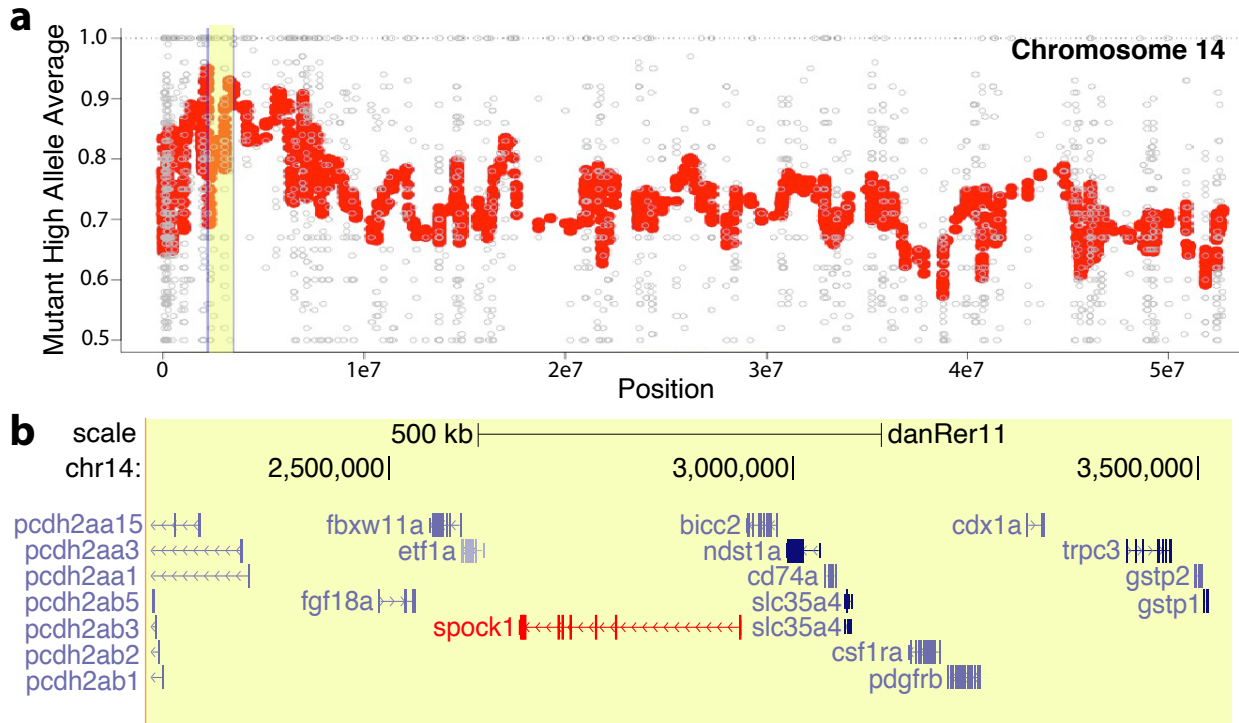

522  
523  
524  
525  
526  
527  
528  
529

**Extended Data Fig. 5. Leaky phenotype maps to chr14:2205271-3513919.** **a**, Manhattan plot of linkage on chromosome 14 with the average mutant alleles per 20 neighbors plotted in red. The region of highest linkage is highlighted in yellow. **b**, Genome browser view of the highest linked region to the leaky phenotype. Eight of the genes within this region were expressed in the 5 dpf bulk RNAseq data: *fgf18a*, *spock1*, *bicc2*, *csf1ra*, *ndst1a*, *slc35a4*, *gstp1* and *gstp2*. Two of these genes were differentially expressed in leaky mutants compared to wild type (*csf1ra* and *gstp2*) and *spock1* (marked in red) had several SNPs that completely segregated in the leaky fish.

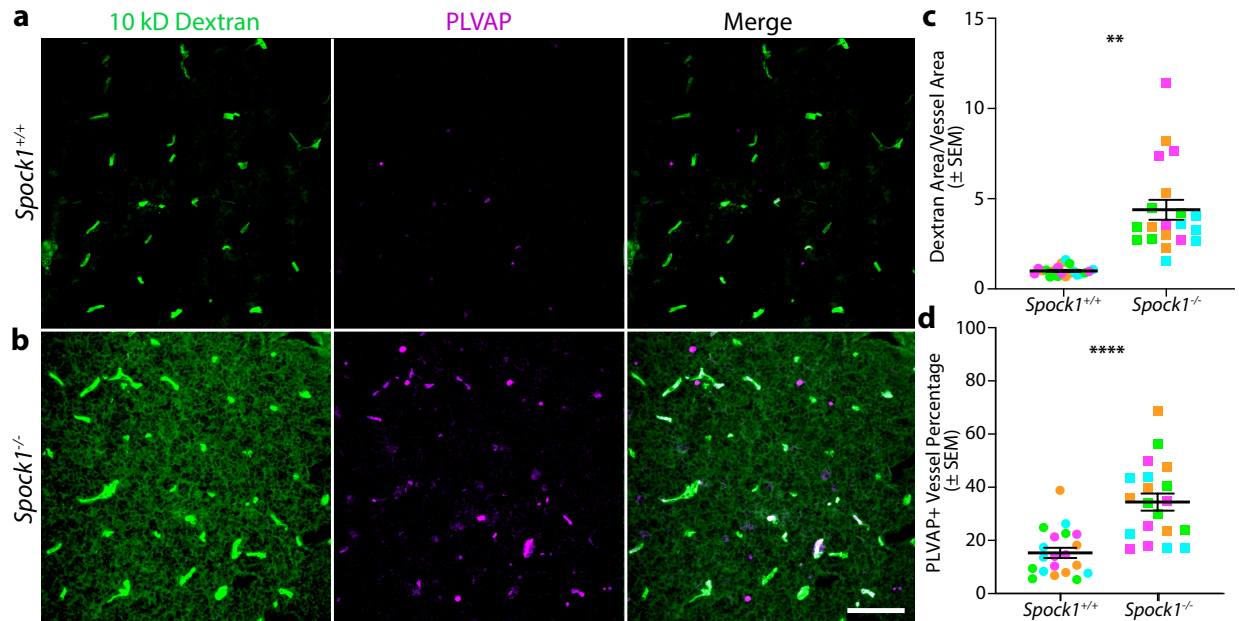

530  
531 **Extended Data Fig. 6. Increased *Spock1*<sup>-/-</sup> leakage of 10 kDa Dextran is associated with an**  
532 **increase in PLVAP expression. a-b**, Zoomed in view of 10 kDa Dextran (green) confined within  
533 the vasculature of wild type (a) vessels and leaked out into the cortex of *Spock1*<sup>-/-</sup> knockouts (b).  
534 This increased BBB permeability in *Spock1*<sup>-/-</sup> mice is accompanied by an increase in PLVAP  
535 (magenta) expression in the vasculature. **c**, Quantification of the total area of Dextran leakage  
536 normalized to vessel area where a ratio of 1 indicates no leakage reveals a significant increase  
537 in Dextran extravasation in the *Spock1*<sup>-/-</sup> embryos (p=0.0048 by nested t test). **d**, Quantification  
538 of PLVAP expression within the vasculature reveals a significant increase in PLVAP expression  
539 in the *Spock1*<sup>-/-</sup> embryos (p<0.0001 by nested t test). N=4 embryos for each genotype, marked  
540 by unique colors, with 5 sections analyzed per embryo. Scale bar represents 50  $\mu$ m.

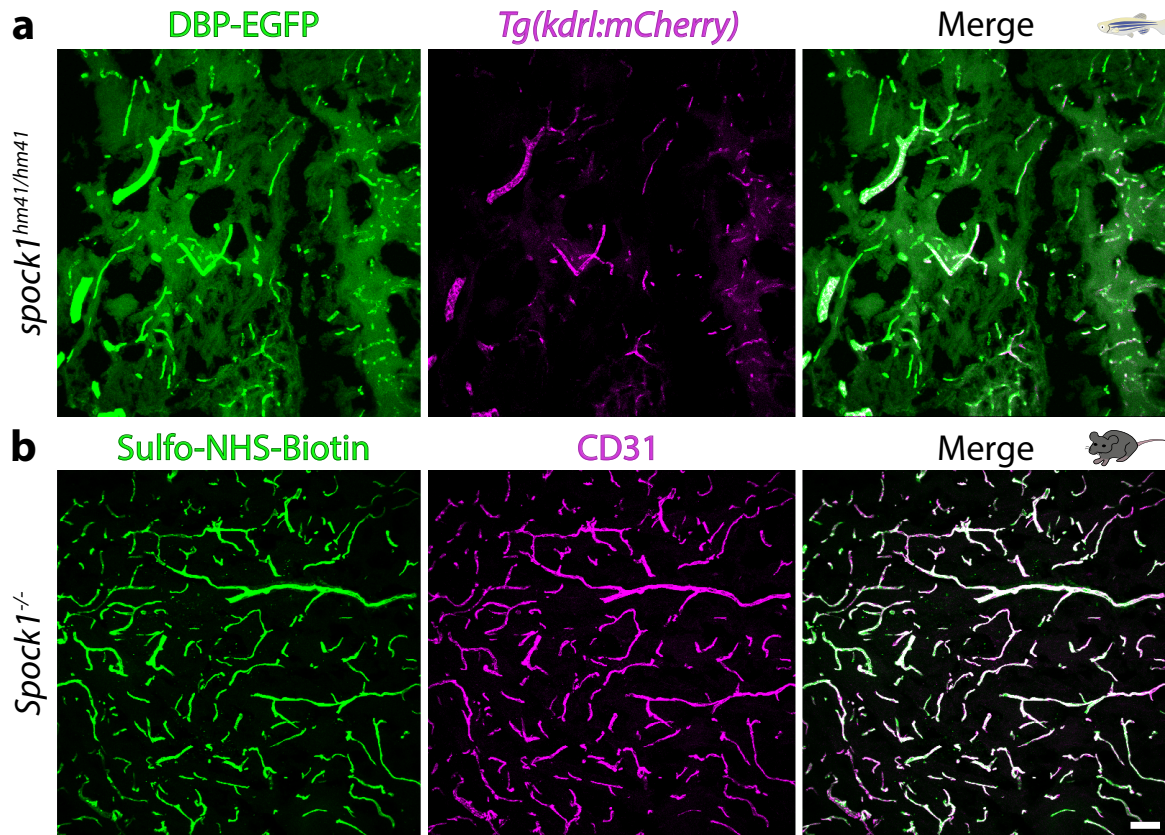

541  
542 **Extended Data Fig. 7. *Spock1<sup>-/-</sup>* mice recover BBB function in adulthood but *spock1<sup>hm41/hm41</sup>***  
543 **mutant fish remain leaky. a,** Zoomed in section of an adult zebrafish *spock1<sup>hm41/hm41</sup>* brain  
544 reveals continued leakage of the transgenic serum tracer DBP-EGFP (green) outside of the  
545 vasculature (magenta). **b,** Adult *Spock1<sup>-/-</sup>* knockout mice, on the other hand, confine the injected  
546 Sulfo-NHS-Biotin tracer (green) within the CD31+ vasculature (magenta), indicating a functional  
547 BBB. Scale bar represents 50  $\mu$ m.



548

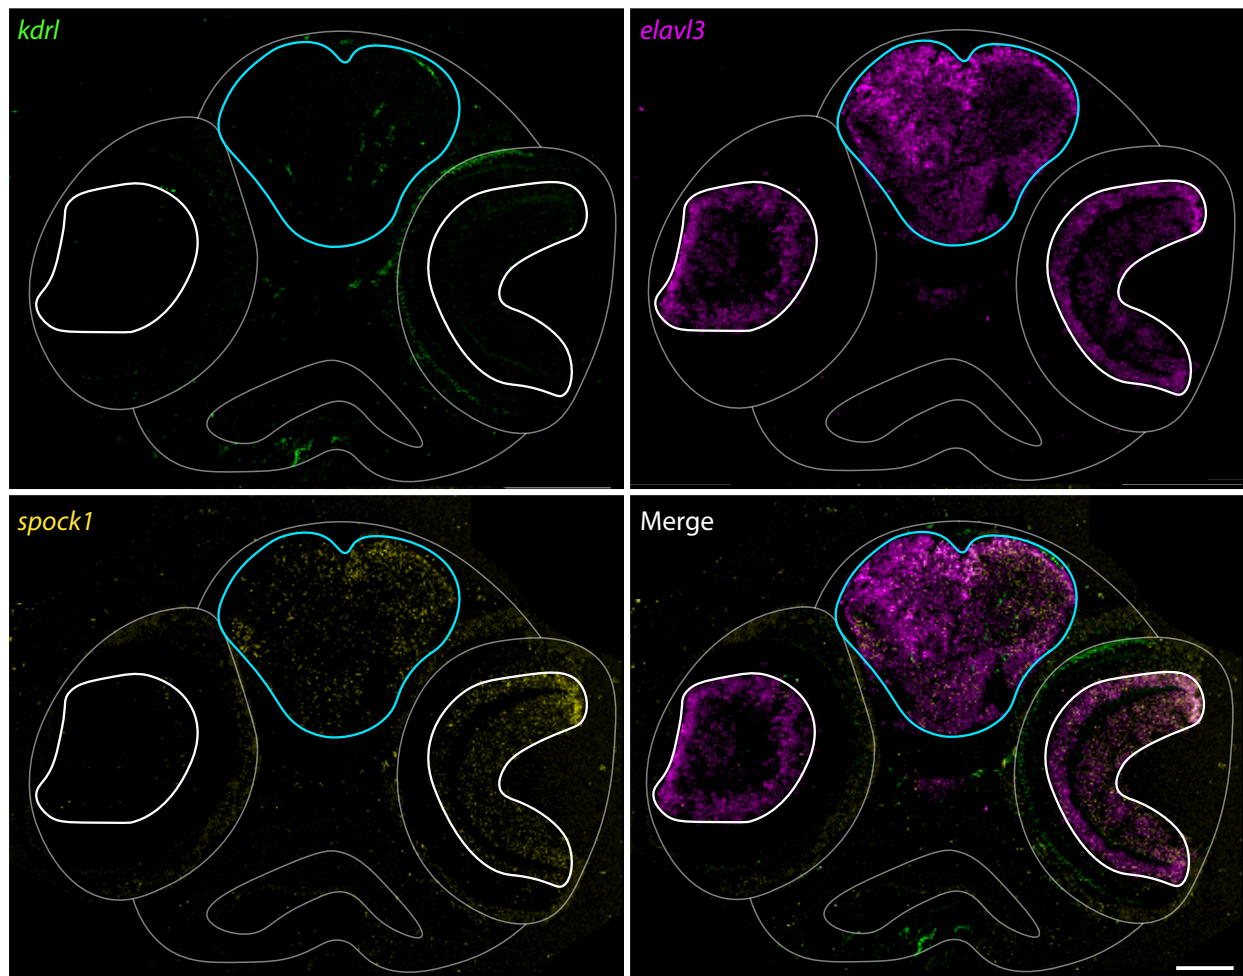

549

550

551 **Extended Data Fig. 8. *Spock1* is expressed throughout the developing central nervous**  
552 **system. *Spock1* expression (yellow) colocalizes with neuronal *elav13* (magenta) expression in the**  
553 **brain (outlined in turquoise) and retina (both outlined in white) of the 4 dpf fish but not the vascular**  
554 ***kdr1* signal (green). Scale bar represents 50  $\mu$ m.**

554

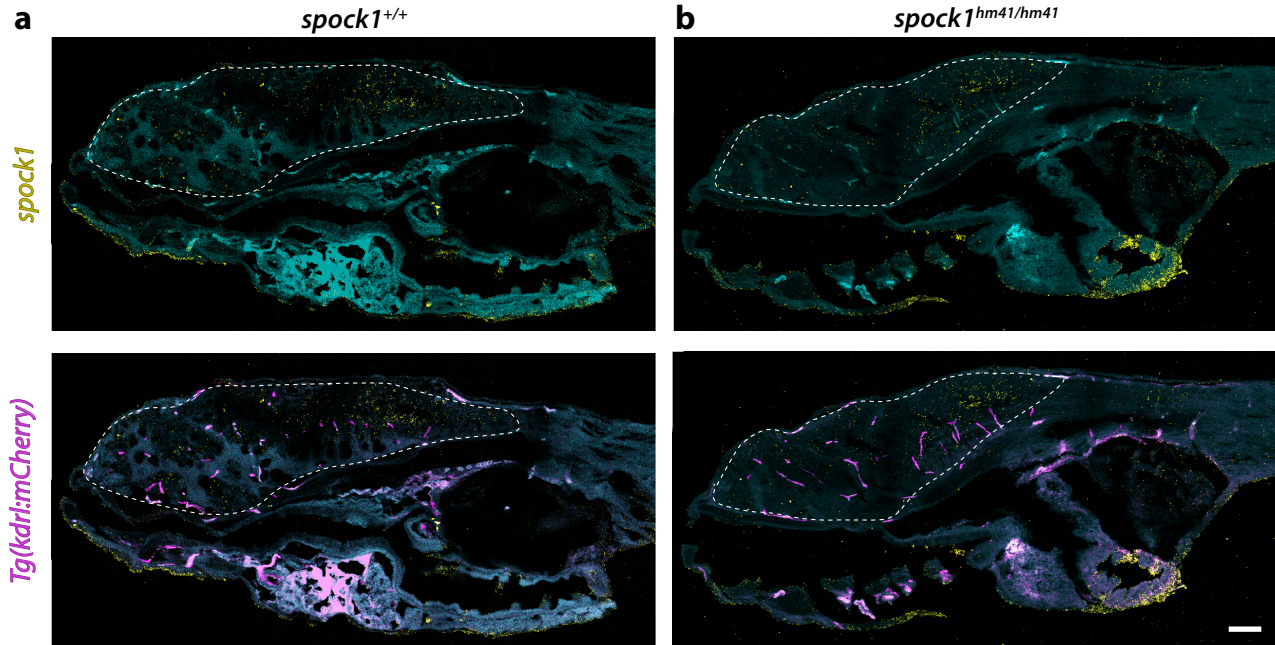

555  
556 **Extended Data Fig. 9. Expression of *spock1* is unaltered in *spock1*<sup>hm41/hm41</sup> mutants. a-b,**  
557 *Spock1* expression (yellow) is found throughout the brain and spinal cord (outlined by a white  
558 dashed line) in wild type (a) and *spock1*<sup>hm41/hm41</sup> mutant fish (b) at 5 dpf. *Spock1* expression never  
559 colocalizes with vascular *Tg(kdrl:mCherry)* expression (magenta). Tissue autofluorescence is  
560 depicted in turquoise. Scale bar represents 50  $\mu$ m.

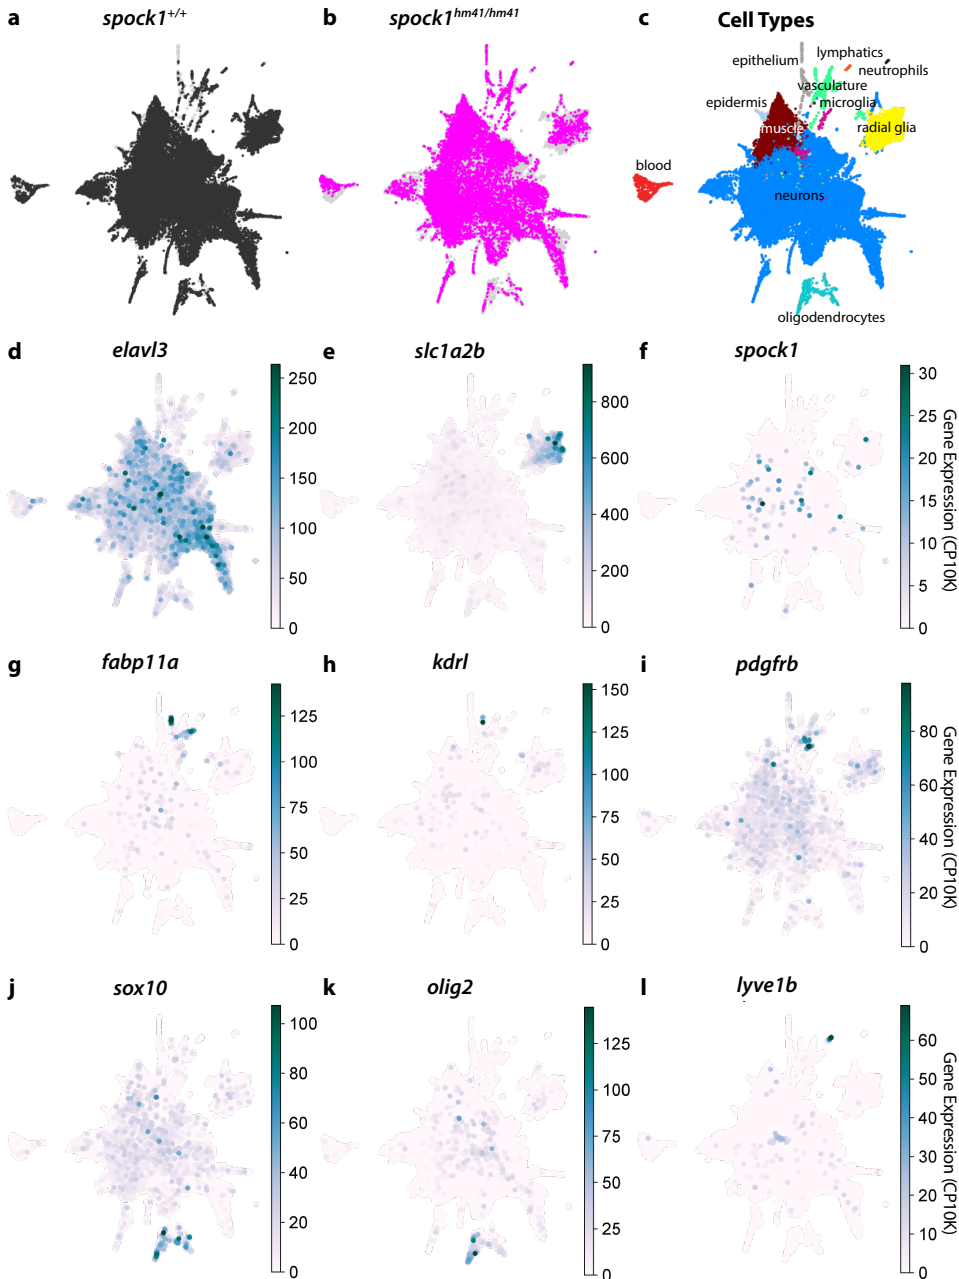

561  
562 **Extended Data Fig. 10. scRNA-seq captures all neurovascular cells in both mutant and wild**  
563 **type larvae. a-b**, UMAP of the whole brain dataset separated shows overlap between wild type  
564 (a) and *spock1*<sup>hm41/hm41</sup> mutant (b) cell type coverage, indicating that no cell type is absent in the  
565 mutant background. c, UMAP of the total data set separated by annotated cell type, with the vast  
566 majority of sequenced cells being neuronal (blue). Our data does capture blood cells (red),  
567 microglia (magenta), oligodendrocytes (aqua), radial glia (yellow), and vascular cells (green). d-  
568 l, Gene expression plots for *elavl3* (d) for neurons, *slc1a2b* (e) for radial glia, *fabp11a* (g) and *kdrl*  
569 (h) for endothelial cells, *pdgfrb* (i) for pericytes and neurons, *sox10* (j) and *olig2* (k) for  
570 oligodendrocytes, and *lyve1b* (l) for lymphatic endothelial cells reveals that *spock1* (f) is primarily  
571 expressed by neurons and absent from the vascular cells.



572 References

- 573 1. Sweeney, M. D., Sagare, A. P. & Zlokovic, B. V. Blood–brain barrier breakdown in Alzheimer  
574 disease and other neurodegenerative disorders. *Nature Publishing Group* 14, 133–150 (2018).
- 575 2. Reese, T. S. & Karnovsky, M. J. Fine structural localization of a blood-brain barrier to  
576 exogenous peroxidase. *J Cell Biology* 34, 207–217 (1967).
- 577 3. Stewart, P. A. & Wiley, M. J. Developing nervous tissue induces formation of blood-brain  
578 barrier characteristics in invading endothelial cells: A study using quail-chick transplantation  
579 chimeras. *Dev Biol* 84, 183–192 (1981).
- 580 4. Lyck, R. *et al.* Culture-induced changes in blood-brain barrier transcriptome: implications for  
581 amino-acid transporters in vivo. *Journal of cerebral blood flow and metabolism : official journal*  
582 *of the International Society of Cerebral Blood Flow and Metabolism* 29, 1491–1502 (2009).
- 583 5. Urich, E., Lazic, S. E., Molnos, J., Wells, I. & Freskgård, P.-O. Transcriptional Profiling of  
584 Human Brain Endothelial Cells Reveals Key Properties Crucial for Predictive In Vitro Blood-  
585 Brain Barrier Models. *PloS one* 7, e38149-16 (2012).
- 586 6. Heithoff, B. P. *et al.* Astrocytes are necessary for blood-brain barrier maintenance in the adult  
587 mouse brain. 99, 125–70 (2020).
- 588 7. Guérit, S. *et al.* Astrocyte-derived Wnt growth factors are required for endothelial blood-brain  
589 barrier maintenance. *Prog Neurobiol* 199, 101937 (2021).
- 590 8. Daneman, R. *et al.* Wnt/beta-catenin signaling is required for CNS, but not non-CNS,  
591 angiogenesis. *Proceedings of the National Academy of Sciences of the United States of*  
592 *America* 106, 641–646 (2009).
- 593 9. Guérit, S. *et al.* Astrocyte-derived Wnt growth factors are required for endothelial blood-brain  
594 barrier maintenance. *Progress in Neurobiology* 334, 101937–19 (2020).
- 595 10. Benz, F. *et al.* Low wnt/ $\beta$ -catenin signaling determines leaky vessels in the subfornical organ  
596 and affects water homeostasis in mice. *Elife* 8, e43818 (2019).
- 597 11. Stenman, J. M. *et al.* Canonical Wnt Signaling Regulates Organ-Specific Assembly and  
598 Differentiation of CNS Vasculature. *Science* 322, 1247–1250 (2008).
- 599 12. Wang, Y. *et al.* Norrin/Frizzled4 signaling in retinal vascular development and blood brain  
600 barrier plasticity. *Cell* 151, 1332–1344 (2012).
- 601 13. Vanhollebeke, B. *et al.* Tip cell-specific requirement for an atypical Gpr124- and Reck-  
602 dependent Wnt/ $\beta$ -catenin pathway during brain angiogenesis. *eLife* 4, (2015).
- 603 14. Wang, Y. *et al.* Interplay of the Norrin and Wnt7a/Wnt7b signaling systems in blood–brain  
604 barrier and blood–retina barrier development and maintenance. *Proceedings of the National*  
605 *Academy of Sciences of the United States of America* 115, E11827–E11836 (2018).

- 606 15. O’Brown, N. M., Megason, S. G. & Gu, C. Suppression of transcytosis regulates zebrafish  
607 blood-brain barrier function. *eLife* 8, 41 (2019).
- 608 16. Xie, J., Farage, E., Sugimoto, M. & Anand-Apte, B. A novel transgenic zebrafish model for  
609 blood-brain and blood-retinal barrier development. *BMC developmental biology* 10, 76 (2010).
- 610 17. Miller, A. C., Obholzer, N. D., Shah, A. N., Megason, S. G. & Moens, C. B. RNA-seq-based  
611 mapping and candidate identification of mutations from forward genetic screens. *Genome*  
612 *research* 23, 679–686 (2013).
- 613 18. Bonnet, F. *et al.* Structure and cellular distribution of mouse brain testican. Association with  
614 the postsynaptic area of hippocampus pyramidal cells. *The Journal of biological chemistry* 271,  
615 4373–4380 (1996).
- 616 19. Edgell, C.-J. S., BaSalamah, M. A. & Marr, H. S. Testican-1: a differentially expressed  
617 proteoglycan with protease inhibiting activities. *International review of cytology* 236, 101–122  
618 (2004).
- 619 20. Ben-Zvi, A. *et al.* Mfsd2a is critical for the formation and function of the blood-brain barrier.  
620 *Nature* 509, 507–511 (2014).
- 621 21. Guo, L., Zhang, H., Hou, Y., Wei, T. & Liu, J. Plasmalemma vesicle-associated protein: A  
622 crucial component of vascular homeostasis. *Exp Ther Med* 12, 1639–1644 (2016).
- 623 22. Charbonnier, F. *et al.* Expression of the proteoglycan SPOCK during mouse embryo  
624 development. *Mechanisms of development* 90, 317–321 (2000).
- 625 23. Raj, B. *et al.* Emergence of Neuronal Diversity during Vertebrate Brain Development.  
626 *Neuron* 1–24 (2020) doi:10.1016/j.neuron.2020.09.023.
- 627 24. Armulik, A., Genové, G. & Betsholtz, C. Pericytes: Developmental, Physiological, and  
628 Pathological Perspectives, Problems, and Promises. *Developmental cell* 21, 193–215 (2011).
- 629 25. Bell, R. D. *et al.* Pericytes control key neurovascular functions and neuronal phenotype in  
630 the adult brain and during brain aging. *Neuron* 68, 409–427 (2010).
- 631 26. Wang, Y., Pan, L., Moens, C. B. & Appel, B. Notch3 establishes brain vascular integrity by  
632 regulating pericyte number. *Development (Cambridge, England)* 141, 307–317 (2013).
- 633 27. Daneman, R., Zhou, L., Kebede, A. A. & Barres, B. A. Pericytes are required for blood-brain  
634 barrier integrity during embryogenesis. *Nature* 468, 562–566 (2010).
- 635 28. Chen, J. *et al.* CD146 coordinates brain endothelial cell–pericyte communication for blood–  
636 brain barrier development. *Proc National Acad Sci* 114, E7622–E7631 (2017).
- 637 29. Westerfield, M. The zebrafish book: a guide for the laboratory use of zebrafish (*Brachydanio*  
638 *rerio*). (1993).

- 639 30. Chi, N. C. *et al.* Foxn4 directly regulates tbx2b expression and atrioventricular canal  
640 formation. *Genes & Development* 22, 734–739 (2008).
- 641 31. Ando, K. *et al.* Clarification of mural cell coverage of vascular endothelial cells by live  
642 imaging of zebrafish. *Development (Cambridge, England)* 143, 1328–1339 (2016).
- 643 32. Li, B. & Dewey, C. N. RSEM: accurate transcript quantification from RNA-Seq data with or  
644 without a reference genome. *BMC bioinformatics* 12, 323 (2011).
- 645 33. Choi, H. M. T. *et al.* Third-generation in situ hybridization chain reaction: multiplexed,  
646 quantitative, sensitive, versatile, robust. *Development (Cambridge, England)* 145, (2018).
- 647 34. Pomreinke, A. P. *et al.* Dynamics of BMP signaling and distribution during zebrafish dorsal-  
648 ventral patterning. *Elife* 6, e25861 (2017).
- 649 35. Bresciani, E., Broadbridge, E. & Liu, P. P. An efficient dissociation protocol for generation of  
650 single cell suspension from zebrafish embryos and larvae. *Methodsx* 5, 1287–1290 (2018).
- 651 36. McGinnis, C. S. *et al.* MULTI-seq: sample multiplexing for single-cell RNA sequencing using  
652 lipid-tagged indices. *Nat Methods* 16, 619–626 (2019).
- 653 37. Klein, A. M. *et al.* Droplet Barcoding for Single-Cell Transcriptomics Applied to Embryonic  
654 Stem Cells. *Cell* 161, 1187–1201 (2015).
- 655 38. Wagner, D. E. *et al.* Single-cell mapping of gene expression landscapes and lineage in the  
656 zebrafish embryo. *Science* 108, eaar4362-13 (2018).
- 657 39. Traag, V. A., Waltman, L. & Eck, N. J. van. From Louvain to Leiden: guaranteeing well-  
658 connected communities. *Sci Rep-uk* 9, 5233 (2019).
- 659 40. Weinreb, C., Wolock, S. & Klein, A. M. SPRING: a kinetic interface for visualizing high  
660 dimensional single-cell expression data. *Bioinformatics* 34, 1246–1248 (2017).
- 661
